# Supplementary material for: Enantioselective vinylogous Michael addition of β,γ-unsaturated butenolide to 2-iminochromenes
Source: Royal Society of Chemistry journal article supplement (doi:10.1039/c9nj01584a), 2019-01-01
Supplement: c9nj01584a1.pdf [file c9nj01584a1.pdf]

## Enantioselective vinylogous Michael addition of $\gamma$ -butenolide to 2-iminochromenes

Vijay Gupta and Ravi P Singh\*<sup>[a]</sup>

*Department of chemistry, Indian Institute of Technology, Delhi, Hauz Khas, New*

*Delhi, 110016, India.*

*ravips@chemistry.iitd.ac.in*

### Supporting Information

#### Table of Contents

|                                                                                |     |
|--------------------------------------------------------------------------------|-----|
| 1. General Information.....                                                    | S2  |
| 2. Preparation of Catalyst.....                                                | S2  |
| 3. Preparation of 2-Iminochromenes.....                                        | S3  |
| 4. Preparation of Racemic Michael adducts.....                                 | S3  |
| 5. General Procedure for Asymmetric Vinylogous Michael Addition Reactions..... | S4  |
| 6. Analytical Data for the Products.....                                       | S4  |
| 7. X-Ray Crystallographic Data for Compound <b>3i</b> .....                    | S12 |
| 8. References.....                                                             | S13 |
| 9. <sup>1</sup> H and <sup>13</sup> C NMR Copies.....                          | S14 |
| 10. HPLC Spectra of Compounds.....                                             | S29 |

## 1. General Informations:

Bruker AV-300 (300 MHz and 75 MHz) and AV-400 (400 MHz and 100 MHz) instruments were used to record  $^1\text{H}$  and  $^{13}\text{C}$  spectra in deuterated solvents with residual solvent signals as internal references.  $^1\text{H}$  NMR data were reported as follow: chemical shifts ( $\delta$ , ppm), multiplicity (s, singlet; d, doublet; t, triplet; q, quartet; m, multiplet), integration, coupling constant (Hz).  $^{13}\text{C}$  NMR data is recorded in terms of chemical shifts ( $\delta$ , ppm). Mass spectra recorded on a high-resolution mass spectrometer (ESI-TOF) in positive-ion mode. Specific rotations were recorded on an Autopol III Automatic Polarimeter. Column chromatography separations were performed on silica gel (100-200 mesh). High Performance Liquid Chromatography was performed on an Agilent 1200 series chromatographs using chiral column (ID, IC, IE, Lux 5u cellulose-4) (250 x 4.6 mm) as noted. UV absorption was monitored at 254 nm. All solvents and inorganic reagents were from commercial sources and used without further purification unless otherwise noted.

**2. Preparation of the Catalysts:** Catalysts **I** was purchased from Sigma Aldrich and used without further purification. Catalyst **II-VIII** was prepared according to known literature procedures.<sup>1</sup>

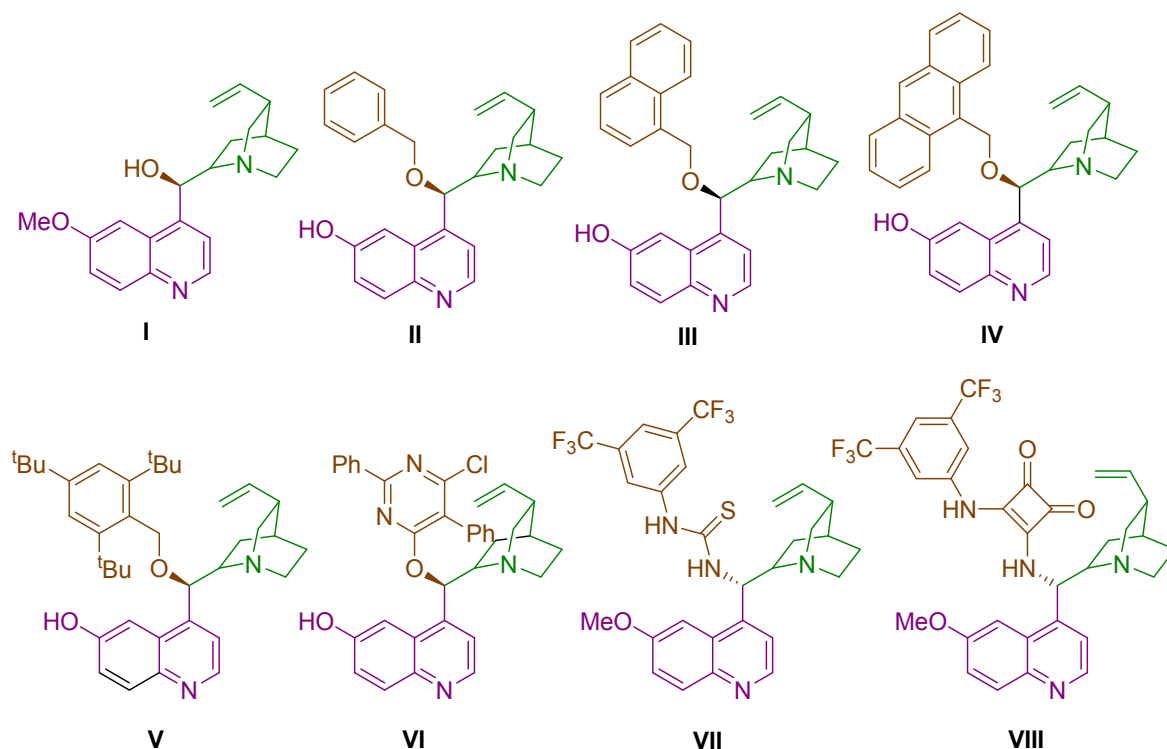

**3. Preparation of 2-iminochromenes:**  $\alpha$ -Angelica lactone was purchased from Alfa Aesar and used without further purification. All salicylaldehyde derivatives were purchased from commercial sources and used without further purification. The electrophile iminochromenes (**1a-l**) were prepared according to the literature procedure.<sup>2</sup>

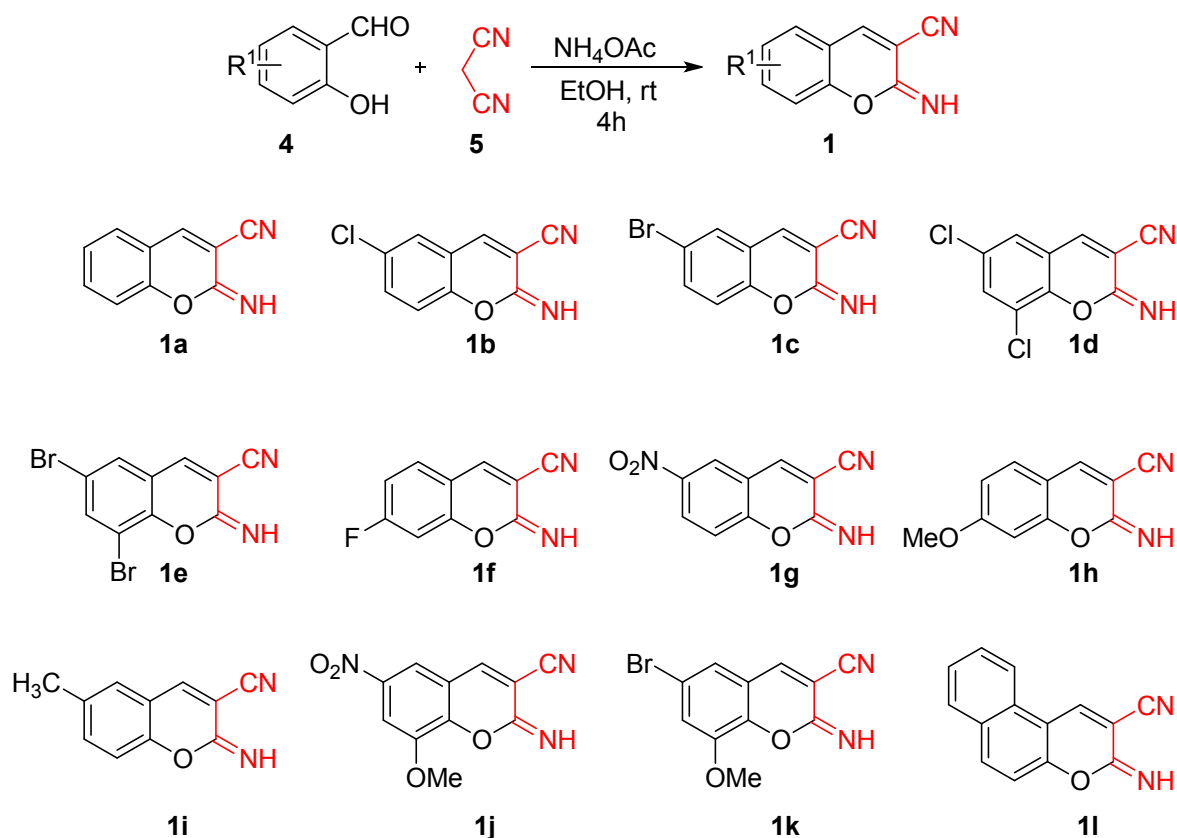

**4. Preparation of Racemic Michael adducts:** To the suspension of iminochromene **1** (0.1 mmol) in anhydrous dichloromethane (1 ml),  $\beta,\gamma$ -butenolide **2** (0.15 mmol) and then triethylamine (20 mol%) were added. The resulting reaction mixture was stirred at room temperature for 16 h. After that, the crude reaction mixture was purified by column chromatography on silica gel using ethylacetate/DCM (3:7) as eluent yielded desire product. The purified product was subjected for HPLC analysis.

## 5. General Procedure for Asymmetric Vinylogous Michael Addition Reactions:

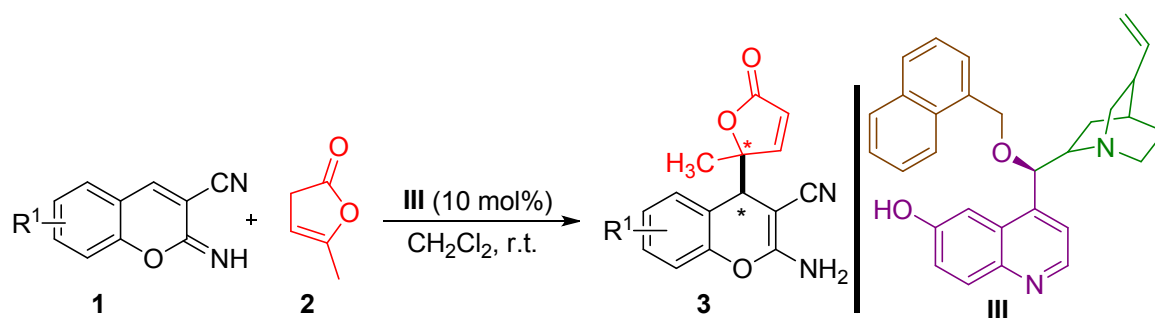

To the suspension of iminochromene **1** (0.1 mmol) in anhydrous dichloromethane (1 ml), catalyst **III** (10 mol%) and then  $\alpha$ -Angelica lactone **2** (0.15 mmol) were added under the  $\text{N}_2$  gas atmosphere. The resulting reaction mixture was stirred at room temperature for 16 h. After that, the crude reaction mixture was purified by column chromatography on silica gel using ethylacetate/DCM (3:7) as eluent afforded the desired product **3**. The purified product was subjected for HPLC analysis.

## 6. Analytical Data for Products:

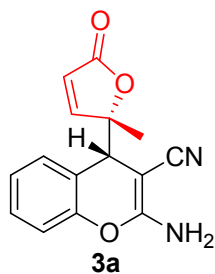

**(S)-2-amino-4-((S)-2-methyl-5-oxo-2,5-dihydrofuran-2-yl)-4H-chromene-3-carbonitrile (**3a**):** To the suspension of iminochromene **1a** (0.1 mmol) in anhydrous dichloromethane (1 ml), catalyst **III** (10 mol%) and then  $\alpha$ -Angelica lactone **2** (0.15 mmol) were added under the  $\text{N}_2$  gas atmosphere. The resulting reaction mixture was stirred at room temperature for 16 h. The *syn/anti* (1.6:1) was determined by  $^1\text{H}$  NMR analysis of crude product ( $\delta$  major: 3.68 ppm,  $\delta$  minor: 3.84 ppm). The crude reaction mixture was purified by column chromatography on silica gel using ethylacetate/DCM (3:7) as eluent afforded the desired product **3a** as white solid (16 mg, 60% yield,  $R_f = 0.4$ , *syn/anti* = 1.6:1). The enantiomeric ratio of the *syn* diastereomer was determined to be 84:16 by HPLC, ID column,  $\lambda = 254$  nm, hexanes:isopropanol = 8:2, 1.0 mL/min,  $t$  (major) = 19.9 min,  $t$  (minor) = 21.9 min,  $t$  (minor) = 24.4 min.  $[\alpha]_{25}^D = -7.04$  ( $c = 0.12$ ,  $\text{CHCl}_3$ );  $^1\text{H-NMR}$  (400 MHz,  $\text{CDCl}_3$ )  $\delta$  7.63 (d,  $J = 5.7$  Hz, 1H), 7.31 (dd,  $J = 9.3$ , 5.8 Hz, 2H), 7.22 – 7.13 (m, 1H), 7.04 (d,  $J = 8.2$  Hz, 1H), 6.09 (d,  $J = 5.7$  Hz, 1H), 4.95 (s, 2H), 3.68 (s, 1H), 1.33 (s, 3H).  $^{13}\text{C-NMR}$  (75 MHz,  $\text{CDCl}_3$ )  $\delta$  171.62, 163.00, 158.59, 150.40, 130.47, 129.25, 125.08, 121.86, 120.29, 118.82, 116.33, 92.11, 53.99, 44.77, 19.39. **FTIR (KBr)  $\text{cm}^{-1}$ :** 3392, 3316, 2928, 2188, 1741, 1643, 1608, 1412, 1267, 1224, 1110, 1049, 822,

762. HRMS-ESI  $[M+Na]^+$ , calcd for  $C_{15}H_{12}N_2NaO_3$  291.0740, found 291.0740. **HRMS-ESI:**  $[M+Na]^+$ , calcd for  $C_{15}H_{12}N_2NaO_3$  291.0740, found 291.0746.

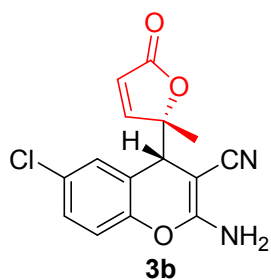

**(S)-2-amino-6-chloro-4-((S)-2-methyl-5-oxo-2,5-dihydrofuran-2-yl)-4H-chromene-3-carbonitrile (3b):** To the suspension of iminochromene **1b** (0.1 mmol) in anhydrous dichloromethane (1 ml), catalyst **III** (10 mol%) and then  $\alpha$ -Angelica lactone (0.15 mmol) were added under the  $N_2$  gas atmosphere. The resulting reaction mixture was stirred at room temperature for 24 h. The *syn*/*anti* ratio (4:1) was determined by  $^1H$  NMR analysis of the crude product ( $\delta$  major: 3.62 ppm,  $\delta$  minor: 3.78 ppm). The crude reaction mixture was purified by column chromatography on silica gel using ethylacetate/DCM (3:7) as eluent afforded the desire product **3b** as white solid (21 mg, 70% yield,  $R_f$  = 0.4, *syn/anti* = 4:1). The enantiomeric ratio of the *syn* diastereomer was determined to be 93:7 by HPLC, [ID column,  $\lambda$  = 254 nm, hexanes:isopropanol = 8:2, 1.0 mL/min, t (major) = 14.2 min, t (minor) = 14.9 min, t (minor) = 16.3 min, t (minor) = 20.7 min].  $[\alpha]_{25}^D$  = -11.05 ( $c$  = 0.19,  $CHCl_3$ );  **$^1H$ -NMR** (400 MHz,  $DMSO-d_6$ )  $\delta$  7.73 (d,  $J$  = 5.2 Hz, 1H), 7.36 (d,  $J$  = 8.6 Hz, 1H), 7.30 – 7.27 (m, 3H), 7.08 (d,  $J$  = 8.6 Hz, 1H), 6.09 (d,  $J$  = 5.3 Hz, 1H), 3.93 (s, 1H), 1.42 (s, 3H).  **$^{13}C$ -NMR** (100 MHz,  $DMSO-d_6$ )  $\delta$  171.34, 163.51, 159.66, 149.42, 129.39, 128.61, 127.43, 122.07, 120.95, 120.70, 117.75, 91.82, 49.28, 42.74, 20.51. **FTIR (KBr)  $cm^{-1}$ :** 3391, 3318, 3192, 2926, 2186, 1751, 1647, 1605, 1418, 1185, 1108. **HRMS-ESI:**  $[M+Na]^+$ , calcd for  $C_{15}H_{11}ClN_2NaO_3$  325.0350, found 325.0353.

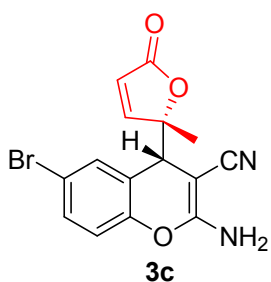

**(S)-2-amino-6-bromo-4-((S)-2-methyl-5-oxo-2,5-dihydrofuran-2-yl)-4H-chromene-3-carbonitrile (3c):** To the suspension of iminochromene **1c** (0.1 mmol) in anhydrous dichloromethane (1 ml), catalyst **III** (10 mol%) and then  $\alpha$ -Angelica lactone (0.15 mmol) were added under the  $N_2$  gas atmosphere. The resulting reaction mixture was stirred at room temperature for 16 h. The *syn/anti* ratio (4.9:1) was determined by  $^1H$  NMR analysis of the crude product ( $\delta$  major: 3.64 ppm,  $\delta$  minor: 3.78 ppm). The crude reaction mixture was purified by column chromatography on silica gel using ethylacetate/DCM (3:7) as eluent afforded the desire product **3c** as light yellow solid (25 mg, 73% yield,  $R_f$  = 0.4, *syn/anti* = 4.9:1). The enantiomeric ratio of the *syn* diastereomer was determined to be 90:10 by HPLC, [ID column,

$\lambda = 254$  nm, hexanes:isopropanol = 8:2, 1.0 mL/min, t (minor) = 27.7 min, t (major) = 40.2 min, t (minor) = 41.2, t (minor) = 53.3 min].  $[\alpha]_{25}^D = -5.62$  ( $c = 0.16$ ,  $\text{CHCl}_3$ );  **$^1\text{H-NMR}$**  (400 MHz,  $\text{DMSO-}d_6$ )  $\delta$  7.72 (d,  $J = 5.7$  Hz, 1H), 7.47 (d,  $J = 8.7$  Hz, 1H), 7.42 (d,  $J = 2.2$  Hz, 1H), 7.32 (s, 2H), 7.01 (d,  $J = 8.7$  Hz, 1H), 6.08 (d,  $J = 5.7$  Hz, 1H), 3.92 (s, 1H), 1.41 (s, 3H).  **$^{13}\text{C-NMR}$**  (75 MHz,  $\text{DMSO-}d_6$ )  $\delta$  171.4, 163.5, 159.7, 149.9, 132.3, 131.5, 122.5, 121.0, 120.7, 118.2, 115.4, 91.9, 49.3, 42.6, 20.6. **FTIR (KBr)  $\text{cm}^{-1}$** : 3402, 3325, 3102, 2925, 2852, 2187, 1751, 1642, 1602, 1415, 1265, 1186, 1110. **HRMS-ESI**:  $[\text{M}+\text{Na}]^+$ , calcd for  $\text{C}_{15}\text{H}_{11}\text{BrN}_2\text{NaO}_3$  368.9845, found 368.9869.

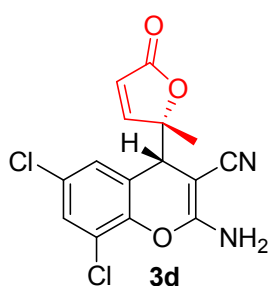

**(S)-2-amino-6,8-dichloro-4-((S)-2-methyl-5-oxo-2,5-dihydrofuran-2-yl)-4H-chromene-3-carbonitrile (3d)**: To the suspension of iminochromene **1d** (0.1 mmol) in anhydrous dichloromethane (1 ml), catalyst **III** (10 mol%) and then  $\alpha$ -Angelica lactone **2** (0.15 mmol) were added under the  $\text{N}_2$  gas atmosphere. The resulting reaction mixture was stirred at room temperature for 24 h. The *syn/anti* ratio (8.6:1) was determined by  $^1\text{H}$  NMR analysis of the crude product ( $\delta$  major: 3.63 ppm,  $\delta$  minor: 3.81 ppm). The crude reaction mixture was purified by column chromatography on silica gel using ethylacetate/DCM (3:7) as eluent afforded the desired product **3d** as white solid (22 mg, 64% yield,  $R_f = 0.5$ , *syn/anti* = 8.6:1). The enantiomeric ratio of the *syn* diastereomer was determined to be 87:13 by HPLC, [Lux cellulose-4 column,  $\lambda = 254$  nm, hexanes:isopropanol = 8:2, 1.0 mL/min, t (minor) = 20.0 min, t (minor) = 28.7 min, t (minor) = 34.3 min, t (major) = 40.3 min].  $[\alpha]_{25}^D = +40.0$  ( $c = 0.01$ ,  $\text{CHCl}_3$ );  **$^1\text{H-NMR}$**  (400 MHz,  $\text{DMSO-}d_6$ )  $\delta$  7.72 (d,  $J = 5.5$  Hz, 1H), 7.63 (s, 1H), 7.45 (s, 2H), 7.28 (s, 1H), 6.07 (d,  $J = 5.6$  Hz, 1H), 3.99 (s, 1H), 1.42 (s, 3H).  **$^{13}\text{C-NMR}$**  (100 MHz,  $\text{DMSO-}d_6$ )  $\delta$  171.43, 163.20, 159.66, 145.57, 128.75, 128.45, 127.64, 123.69, 121.40, 120.88, 120.61, 91.83, 49.66, 43.01, 20.66. **FTIR (KBr)  $\text{cm}^{-1}$** : 3422, 3348, 3199, 2927, 2855, 2187, 1745, 1645, 1608, 1418, 1245, 1115. **HRMS-ESI**:  $[\text{M}+\text{Na}]^+$ , calcd for  $\text{C}_{15}\text{H}_{10}\text{Cl}_2\text{N}_2\text{NaO}_3$  358.9960, found 358.9966.

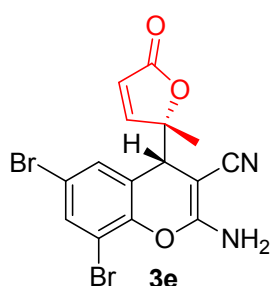

**(S)-2-amino-6,8-dibromo-4-((S)-2-methyl-5-oxo-2,5-dihydrofuran-2-yl)-4H-chromene-3-carbonitrile (3e)**: To the suspension of iminochromene **1e** (0.1 mmol) in anhydrous dichloromethane (1 ml), catalyst **III** (10 mol%) and then  $\alpha$ -Angelica lactone **2** (0.15 mmol) were added under the  $\text{N}_2$  gas

atmosphere. The resulting reaction mixture was stirred at room temperature for 20 h. The *syn/anti* ratio (4:1) was determined by  $^1\text{H}$  NMR analysis of the crude product ( $\delta$  major: 3.56 ppm,  $\delta$  minor: 3.73 ppm). The crude reaction mixture was purified by column chromatography on silica gel using ethylacetate/DCM (3:7) as eluent afforded the desired product **3e** as solid (21 mg, 52% yield,  $R_f$  = 0.5, *syn/anti* = 4:1). The enantiomeric ratio of the *syn* diastereomer was determined to be 90:10 by HPLC, [Lux cellulose-4 column,  $\lambda$  = 254 nm, hexanes:isopropanol = 8:2, 1.0 mL/min, t (minor) = 23.0 min, t (minor) = 34.9 min, t (minor) = 39.5 min, t (major) = 45.2 min].  $[\alpha]_{25}^D = +3.33$  ( $c$  = 0.15,  $\text{CHCl}_3$ );  $^1\text{H-NMR}$  (300 MHz,  $\text{DMSO-}d_6$ )  $\delta$  7.83 (d,  $J$  = 3 Hz, 1H), 7.72 (d,  $J$  = 5.7 Hz, 1H), 7.50-7.39 (m, 3H), 6.08 (d,  $J$  = 5.7 Hz, 1H), 3.99 (s, 1H), 1.41 (s, 3H).  $^{13}\text{C-NMR}$  (100 MHz,  $\text{DMSO-}d_6$ )  $\delta$  171.31, 163.17, 159.53, 147.00, 134.05, 131.83, 123.90, 120.81, 120.49, 115.58, 110.52, 91.76, 49.68, 42.99, 20.58. **FTIR (KBr)  $\text{cm}^{-1}$** : 3448, 3342, 3205, 2925, 2854, 2186, 1743, 1648, 1522, 1414, 1252, 1178. **HRMS-ESI**:  $[\text{M}+\text{Na}]^+$ , calcd for  $\text{C}_{15}\text{H}_{10}\text{Br}_2\text{N}_2\text{NaO}_3$  446.8950, found 446.8946.

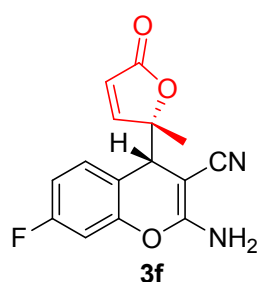

**(S)-2-amino-7-fluoro-4-((S)-2-methyl-5-oxo-2,5-dihydrofuran-2-yl)-4H-chromene-3-carbonitrile (3f):**

To the suspension of iminochromene **1f** (0.1 mmol) in anhydrous dichloromethane (1 ml), catalyst **III** (10 mol%) and then  $\alpha$ -Angelica lactone **2** (0.15 mmol) were added under the  $\text{N}_2$  gas atmosphere. The resulting reaction mixture was stirred at room temperature for 16 h. The *syn/anti* ratio (2.1:1) was determined by  $^1\text{H}$  NMR analysis of the crude product ( $\delta$  major: 3.67 ppm,  $\delta$  minor: 3.76 ppm). The crude reaction mixture was purified by column chromatography on silica gel using ethylacetate/DCM (3:7) as eluent afforded the desired product **3f** light yellow solid (17 mg, 58% yield,  $R_f$  = 0.5, *syn/anti* = 2.1:1). The enantiomeric ratio of the *syn* diastereomer was determined to be 89:11 by HPLC, [Lux 5u cellulose-4 column,  $\lambda$  = 254 nm, hexanes:isopropanol = 8:2, 1.0 mL/min, t (minor) = 18.9 min, t (minor) = 24.9 min, t (minor) = 28.5 min, t (major) = 35.9 min].  $[\alpha]_{25}^D = -12.22$  ( $c$  = 0.18,  $\text{CHCl}_3$ );  $^1\text{H-NMR}$  (400 MHz,  $\text{DMSO-}d_6$ )  $\delta$  7.67 (d,  $J$  = 5.7 Hz, 1H), 7.24 (s, 2H), 7.23 – 7.15 (m, 1H), 7.08 – 6.95 (m, 1H), 6.92 (dd,  $J$  = 9.4, 2.3 Hz, 1H), 6.02 (d,  $J$  = 5.7 Hz, 1H), 3.89 (s, 1H), 1.40 (s, 3H).  $^{13}\text{C-NMR}$  (100 MHz,  $\text{DMSO-}d_6$ )  $\delta$  171.93, 163.82, 160.21, 151.75, 151.62, 131.97, 131.87, 121.48, 121.17, 116.80 (d,  $J$  = 3.1 Hz), 111.53 (d,  $J$  = 21.7 Hz), 104.13 (d,  $J$  = 25.5 Hz), 92.47, 50.29, 42.92, 21.03. **FTIR (KBr)  $\text{cm}^{-1}$** : 3475, 3312, 3195, 2924, 2192,

1745, 1648, 1501, 1409, 1148, 1111. **HRMS-ESI:**  $[M+Na]^+$ , calcd for  $C_{15}H_{11}FN_2NaO_3$  309.0646, found 309.0651.

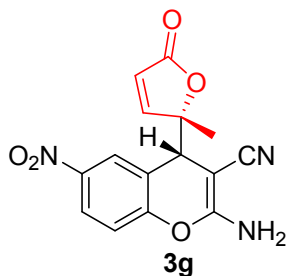

**(S)-2-amino-4-((S)-2-methyl-5-oxo-2,5-dihydrofuran-2-yl)-6-**

**nitro-4H-chromene-3-carbonitrile (3g):**

To the suspension of iminochromene **1g** (0.1 mmol) in anhydrous dichloromethane (1 ml), catalyst **III** (10 mol%) and then  $\alpha$ -Angelica lactone **2** (0.15 mmol) were added under the  $N_2$  gas atmosphere. The resulting reaction mixture was stirred at room temperature for 16 h. The *syn/anti* ratio (4:1) was determined by  $^1H$  NMR analysis of the crude product ( $\delta$  major: 3.77 ppm,  $\delta$  minor: 3.90 ppm). The crude reaction mixture was purified by column chromatography on silica gel using ethylacetate/DCM (3:7) as eluent afforded the desire product **3g** yellow solid (12 mg, 40% yield,  $R_f$  = 0.3, *syn/anti* = 4:1). The enantiomeric ratio of the *syn* diastereomer was determined to be 87:13 by HPLC, [ID column,  $\lambda$  = 254 nm, hexanes:isopropanol = 8:2, 1.0 mL/min, t (major) = 20.7 min, t (minor) = 22.7 min, t (minor) = 24.8 min, t (minor) = 37.5min].  $[\alpha]_{25}^D = +20.0$  ( $c$  = 0.06,  $CHCl_3$ );  **$^1H$ -NMR** (400 MHz,  $DMSO-d_6$ )  $\delta$  8.21 (s, 2H), 7.71 (d,  $J$  = 5.4 Hz, 1H), 7.43 (s, 2H), 7.30 (d,  $J$  = 9.3 Hz, 1H), 6.16 (d,  $J$  = 5.2 Hz, 1H), 4.17 (s, 1H), 1.46 (s, 3H).  **$^{13}C$ -NMR** (100 MHz,  $DMSO-d_6$ )  $\delta$  171.30, 162.66, 158.86, 154.90, 143.20, 125.66, 124.59, 121.82, 121.35, 120.26, 117.32, 91.16, 49.44, 42.27, 20.91. **FTIR (KBr)  $cm^{-1}$ :** 3421, 3328, 3202, 2928, 2195, 1742, 1649, 1525, 1415, 1258, 1092. **HRMS-ESI:**  $[M+Na]^+$ , calcd for  $C_{15}H_{11}N_3NaO_5$  336.0591, found 336.0596.

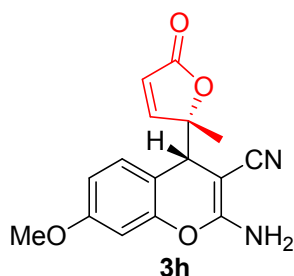

**(S)-2-amino-7-methoxy-4-((S)-2-methyl-5-oxo-2,5-dihydrofuran-2-yl)-4H-**

**chromene-3-carbonitrile (3h):**

To the suspension of iminochromene **1h** (0.1 mmol) in anhydrous dichloromethane (1 ml), catalyst **III** (10 mol%) and then  $\alpha$ -Angelica lactone (0.15 mmol) were added under the  $N_2$  gas atmosphere. The resulting reaction mixture was stirred at room temperature for 16 h. The *syn/anti* ratio (2.7:1) was determined by  $^1H$  NMR analysis of the crude product ( $\delta$  major: 3.55 ppm,  $\delta$  minor: 3.75 ppm). The crude reaction mixture was purified by column chromatography on silica gel using ethylacetate/DCM (3:7) as eluent afforded the desire product **3h** as white solid (19 mg, 63% yield,  $R_f$  = 0.5, *syn/anti* = 2.7:1). The enantiomeric ratio of the *syn* diastereomer was determined to be 87:13 by HPLC, [IE



column,  $\lambda = 254$  nm, hexanes:isopropanol = 8:2, 1.0 mL/min, t (minor) = 24.9 min, t (major) = 26.9 min, t (minor) = 30.8 min, t (minor) = 33.0 min].  $[\alpha]_{25}^D = -1.33$  ( $c = 0.15$ ,  $\text{CHCl}_3$ );  **$^1\text{H-NMR}$**  (400 MHz,  $\text{DMSO-}d_6$ )  $\delta$  7.64 (d,  $J = 5.4$  Hz, 1H), 7.25 – 6.98 (m, 3H), 6.72 (d,  $J = 6.2$  Hz, 1H), 6.55 (s, 1H), 6.03 (d,  $J = 5.4$  Hz, 1H), 3.79 (s, 1H), 3.74 (s, 3H), 1.39 (s, 3H).  **$^{13}\text{C-NMR}$**  (100 MHz,  $\text{DMSO-}d_6$ )  $\delta$  171.65, 163.69, 159.90, 159.43, 151.38, 130.71, 121.36, 120.73, 111.95, 110.27, 101.15, 92.31, 55.46, 50.14, 42.68, 20.69. **FTIR (KBr)  $\text{cm}^{-1}$** : 3448, 3332, 3203, 2924, 2852, 2185, 1748, 1652, 1510, 1408, 1251, 1111. **HRMS-ESI**:  $[\text{M}+\text{Na}]^+$ , calcd for  $\text{C}_{15}\text{H}_{14}\text{N}_2\text{NaO}_4$  321.0845, found 321.0851.

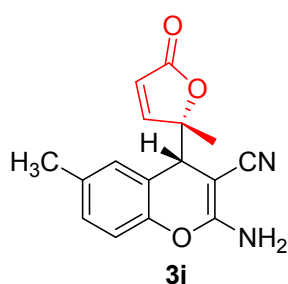

**(S)-2-amino-6-methyl-4-((S)-2-methyl-5-oxo-2,5-dihydrofuran-2-yl)-4H-chromene-3-carbonitrile (3i)**: To the suspension of iminochromene **1i** (0.1 mmol) in anhydrous dichloromethane (1 ml), catalyst **III** (10 mol%) and then  $\alpha$ -Angelica lactone **2** (0.15 mmol) were added under the  $\text{N}_2$  gas atmosphere. The resulting reaction mixture was stirred at room temperature for 16 h. The *syn/anti* ratio (2.3:1) was determined by  $^1\text{H}$  NMR analysis of the crude product ( $\delta$  major: 3.75 ppm,  $\delta$  minor: 3.81 ppm). The crude reaction mixture was purified by column chromatography on silica gel using ethylacetate/DCM (3:7) as eluent afforded the desired product **3i** as white solid (17 mg, 61% yield,  $R_f = 0.5$ , *syn/anti* = 2.3:1). The enantiomeric ratio of the *syn* diastereomer was determined to be 86:14 by HPLC, [IC column,  $\lambda = 254$  nm, hexanes:isopropanol = 8:2, 1.0 mL/min, t (major) = 25.1 min, t (minor) = 40.2 min, t (major) = 51.7 min, t (minor) = 71.1 min].  $[\alpha]_{25}^D = -6.67$  ( $c = 0.03$ ,  $\text{CHCl}_3$ );  **$^1\text{H-NMR}$**  (400 MHz,  $\text{DMSO-}d_6$ )  $\delta$  7.63 (dd,  $J = 5.7, 2.0$  Hz, 1H), 7.17 (s, 2H), 7.09 (s, 1H), 7.00 (s, 1H), 6.92 (d,  $J = 8.2$  Hz, 1H), 6.05 (dd,  $J = 5.7, 2.0$  Hz, 1H), 3.81 (s, 1H), 2.26 (s, 3H), 1.40 (s, 3H).  **$^{13}\text{C-NMR}$**  (75 MHz,  $\text{DMSO-}d_6$ )  $\delta$  171.47, 163.80, 159.69, 148.55, 132.81, 130.09, 129.19, 121.29, 120.64, 119.72, 115.58, 92.01, 49.54, 43.21, 20.65, 20.31. **FTIR (KBr)  $\text{cm}^{-1}$** : 3416, 3325, 3198, 2924, 2852, 2187, 1749, 1648, 1428, 1258, 1178, 1107. **HRMS-ESI**:  $[\text{M}+\text{Na}]^+$ , calcd for  $\text{C}_{16}\text{H}_{14}\text{N}_2\text{NaO}_3$  305.0897, found 305.0888.

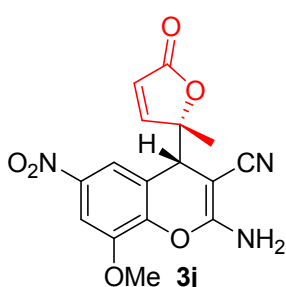

**(S)-2-amino-8-methoxy-4-((S)-2-methyl-5-oxo-2,5-dihydrofuran-2-yl)-6-nitro-4H-chromene-3-carbonitrile (3j)**: To the suspension of iminochromene **1j** (0.1 mmol) in anhydrous dichloromethane (1 ml), catalyst **III** (10 mol%) and then  $\alpha$ -Angelica lactone **2** (0.15 mmol) were added under the  $\text{N}_2$  gas atmosphere. The resulting

reaction mixture was stirred at room temperature for 16 h. The *syn/anti* ratio (2.3:1) was determined by  $^1\text{H}$  NMR analysis of the crude product ( $\delta$  major: 3.74 ppm,  $\delta$  minor: 3.87 ppm). The crude reaction mixture was purified by column chromatography on silica gel using ethylacetate/DCM (3:7) as eluent afforded the desire product **3j** as yellow solid (40% yield,  $R_f=0.4$ , *syn/anti* = 2:1). The enantiomeric ratio of the *syn* diastereomer was determined to be 89:11 by HPLC, [ID column,  $\lambda = 254$  nm, hexanes:isopropanol = 8:2, 1.0 mL/min, t (minor) = 25.7 min, t (major) = 28.1 min, t (minor) = 31.8 min, t (minor) = 34.6 min].  $[\alpha]_{25}^D = +7.0$  ( $c = 0.08$ ,  $\text{CHCl}_3$ );  $^1\text{H-NMR}$  (300 MHz,  $\text{DMSO-}d_6$ )  $\delta$  7.77 (m, 3H), 7.47 (s, 2H), 6.02 (d,  $J = 5.7$  Hz, 1H), 4.09 (s, 1H), 3.93 (s, 3H), 1.42 (s, 3H).  $^{13}\text{C-NMR}$  (75 MHz,  $\text{DMSO-}d_6$ )  $\delta$  171.27, 162.88, 159.52, 147.45, 144.70, 142.83, 121.50, 120.77, 117.08, 106.55, 91.73, 56.51, 49.37, 42.56, 20.54. **FTIR** (KBr)  $\text{cm}^{-1}$ : 3381, 3329, 2924, 2854, 2194, 1746, 1655, 1529, 1416, 1344, 1227, 1104, 960, 825. **HRMS-ESI**:  $[\text{M}+\text{Na}]^+$ , calcd for  $\text{C}_{16}\text{H}_{13}\text{N}_3\text{NaO}_6$  366.0696, found 366.0704.

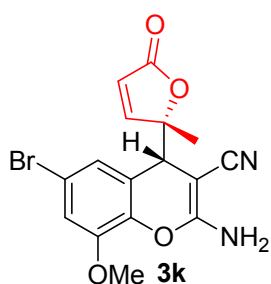

**(S)-2-amino-6-bromo-8-methoxy-4-((S)-2-methyl-5-oxo-2,5-**

**dihydrofuran-2-yl)-4H-chromene-3-carbonitrile (3k):**

To the suspension of iminochromene **1k** in anhydrous dichloromethane (1 ml), catalyst **III** (10 mol%) and then  $\alpha$ -Angelica lactone **2** (0.15 mmol) were added under the  $\text{N}_2$  gas atmosphere. The resulting reaction mixture was stirred at room temperature for 16 h. The *syn/anti* ratio (2.7:1) was determined by  $^1\text{H}$  NMR analysis of crude product ( $\delta$  major: 3.61 ppm,  $\delta$  minor: 3.78 ppm). The crude reaction mixture was purified by column chromatography on silica gel using ethylacetate/DCM (3:7) as eluent afforded the desire product **3k** (27 mg, 67% yield,  $R_f=0.4$ , *syn/anti* = 2.7:1). The enantiomeric ratio of the *syn* diastereomer was determined to be 93:7 by HPLC, [ID column,  $\lambda = 254$  nm, hexanes:isopropanol = 8:2, 1.0 mL/min, t (major) = 21.0 min, t (minor) = 22.6 min, t (minor) = 27.6 min, t (minor) = 29.4 min].  $[\alpha]_{25}^D = +13.75$  ( $c = 0.24$ ,  $\text{CHCl}_3$ );  $^1\text{H-NMR}$  (400 MHz,  $\text{DMSO-}d_6$ )  $\delta$  7.69 (d,  $J = 5.5$  Hz, 1H), 7.28 (s, 2H), 7.20 (s, 1H), 6.99 (s, 1H), 6.07 (d,  $J = 5.5$  Hz, 1H), 3.88 (s, 1H), 3.83 (s, 3H), 1.40 (s, 3H).  $^{13}\text{C-NMR}$  (100 MHz,  $\text{DMSO-}d_6$ )  $\delta$  171.39, 163.46, 159.62, 147.93, 139.33, 123.38, 122.83, 120.91, 120.61, 115.21, 114.68, 91.82, 56.22, 49.37, 42.79, 20.63. **FTIR** (KBr)  $\text{cm}^{-1}$ : 3405, 3325, 2925, 2187, 1749, 1652, 1575, 1483, 1420, 1263, 1101. **HRMS-ESI**:  $[\text{M}+\text{Na}]^+$ , calcd for  $\text{C}_{16}\text{H}_{13}\text{BrN}_2\text{NaO}_4$  398.9950, found 398.9956.

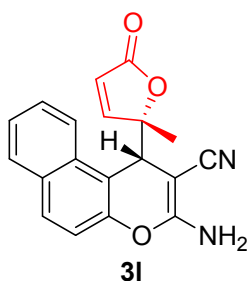

**(S)-3-amino-1-((S)-2-methyl-5-oxo-2,5-dihydrofuran-2-yl)-1H-benzo[f]chromene-2-carbonitrile (31):** To the suspension of iminochromene **11** (0.1 mmol) in anhydrous dichloromethane (1 ml), catalyst **III** (10 mol%) and then  $\alpha$ -Angelica lactone **2** (0.15 mmol) were added under the N<sub>2</sub> gas atmosphere. The resulting reaction mixture was stirred at room temperature for 24 h. The *syn/anti* ratio (1:1) was determined by <sup>1</sup>H NMR analysis of crude product ( $\delta$  major: 4.63 ppm,  $\delta$  minor: 4.75 ppm). The crude reaction mixture was purified by column chromatography on silica gel using ethylacetate/DCM (3:7) as eluent afforded the desire product **31** (13 mg, 40% yield,  $R_f=0.5$ , *syn/anti* = 1:1). The enantiomeric ratio of the *syn* diastereomer was determined to be 83:17 by HPLC, [ID column,  $\lambda$  = 254 nm, hexanes:isopropanol = 8:2, 1.0 mL/min, t (major) = 19.8 min, t (minor) = 23.5 min, t (major) = 26.5 min, t (major) = 28.6 min].  $[\alpha]_{25}^D = +5.00$  ( $c = 0.06$ , CHCl<sub>3</sub>); **<sup>1</sup>H-NMR** (400 MHz, DMSO-*d*<sub>6</sub>)  $\delta$  8.23 (s, 1H), 7.91 (s, 2H), 7.61 (s, 2H), 7.49 (s, 1H), 7.28 (m, 3H), 5.62 (s, 1H), 4.63 (s, 1H), 1.55 (s, 3H). **<sup>13</sup>C-NMR** (100 MHz, DMSO-*d*<sub>6</sub>)  $\delta$  171.29, 163.98, 159.10, 148.91, 130.60, 130.25, 129.29, 128.28, 126.79, 124.77, 123.83, 121.35, 119.19, 116.46, 113.72, 92.92, 50.28, 38.86, 20.95. **FTIR (KBr) cm<sup>-1</sup>**: 3448, 3322, 2925, 2185, 1748, 1645, 1587, 1412, 1243, 1105. **HRMS-ESI**: [M+Na]<sup>+</sup>, calcd for C<sub>19</sub>H<sub>14</sub>N<sub>2</sub>NaO<sub>3</sub> 341.0896, found 341.0902.

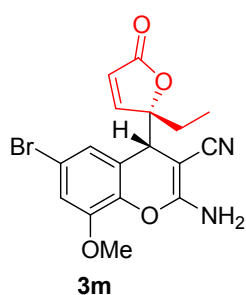

**(S)-2-amino-6-bromo-4-((S)-2-ethyl-5-oxo-2,5-dihydrofuran-2-yl)-8-methoxy-4H-chromene-3-carbonitrile (3m):** To the suspension of iminochromene **1k** in anhydrous dichloromethane (1 ml), catalyst **III** (10 mol%) and then 5-ethylfuran-2(3H)-one (0.15 mmol) were added under the N<sub>2</sub> gas atmosphere. The resulting reaction mixture was stirred at room temperature for 16 h. The *syn/anti* ratio (2.1:1) was determined by <sup>1</sup>H NMR analysis of crude product ( $\delta$  major: 3.67 ppm,  $\delta$  minor: 3.86 ppm). The crude reaction mixture was purified by column chromatography on silica gel using ethylacetate/DCM (3:7) as eluent afforded the desire product **3m** (28 mg, 71% yield,  $R_f=0.4$ , *syn/anti* = 2.1:1). The enantiomeric ratio of the *syn* diastereomer was determined to be 95:5 by HPLC, [Lux cellulose-4 column,  $\lambda$  = 254 nm, hexanes:isopropanol = 8:2, 1.0 mL/min, t (minor) = 44.9 min, t (minor) = 52.5 min, t (minor) = 83.0 min, t

(major) = 117.4 min].  $[\alpha]_{25}^D = +0.12$  ( $c = 0.27$ ,  $\text{CHCl}_3$ );  $^1\text{H-NMR}$  (300 MHz,  $\text{CDCl}_3$ )  $\delta$  7.43 (d,  $J = 5.7$  Hz, 1H), 6.99 (d,  $J = 2.9$  Hz, 2H), 6.15 (d,  $J = 5.7$  Hz, 1H), 5.08 (s, 2H), 3.87 (s, 3H), 3.67 (s, 1H), 1.83 – 1.73 (m, 2H), 0.71 (t,  $J = 7.3$  Hz, 3H).  $^{13}\text{C-NMR}$  (75 MHz,  $\text{CDCl}_3$ )  $\delta$  171.80, 162.92, 156.71, 148.27, 139.44, 124.10, 123.45, 121.90, 117.35, 115.16, 94.74, 56.44, 54.12, 44.69, 29.81, 7.29. **FTIR** (KBr)  $\text{cm}^{-1}$ : 3402, 3319, 2922, 2185, 1748, 1651, 1573, 1481, 1416, 1260, 1104. **HRMS-ESI**:  $[\text{M}+\text{Na}]^+$ , calcd for  $\text{C}_{17}\text{H}_{15}\text{BrN}_2\text{NaO}_4$  413.0113, found 413.0119.

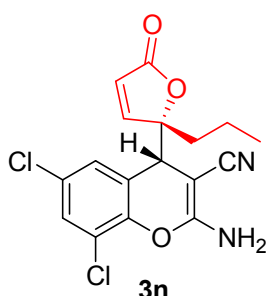

**(S)-2-amino-6,8-dichloro-4-((S)-5-oxo-2-propyl-2,5-dihydrofuran-2-yl)-4H-chromene-3-carbonitrile (3n)**: To the suspension of iminochromene **1d** in anhydrous dichloromethane (1 ml), catalyst III (10 mol%) and then 5-propylfuran-2(3H)-one (0.15 mmol) were added under the  $\text{N}_2$  gas atmosphere. The resulting reaction mixture was stirred at room temperature for 16 h. The *syn/anti* ratio (9:1) was determined by  $^1\text{H}$  NMR analysis of crude product ( $\delta$  major: 3.67 ppm,  $\delta$  minor: 3.87 ppm). The crude reaction mixture was purified by column chromatography on silica gel using ethylacetate/DCM (3:7) as eluent afforded the desire product **3n** (27 mg, 75% yield,  $R_f=0.4$ , *syn/anti* = 9:1). The enantiomeric ratio of the *syn* diastereomer was determined to be 89:11 by HPLC, [Lux cellulose-4 column,  $\lambda = 254$  nm, hexanes:isopropanol = 8:2, 1.0 mL/min, t (minor) = 19.5 min, t (minor) = 22.8 min, t (minor) = 34.0 min, t (major) = 48.7 min].  $[\alpha]_{25}^D = -0.02$  ( $c = 0.16$ ,  $\text{CHCl}_3$ );  $^1\text{H-NMR}$  (300 MHz,  $\text{CDCl}_3$ )  $\delta$  7.51 (d,  $J = 5.7$  Hz, 1H), 7.38 (d,  $J = 2.3$  Hz, 1H), 7.18 (d,  $J = 2.3$  Hz, 1H), 6.16 (d,  $J = 5.7$  Hz, 1H), 5.21 (s, 2H), 3.67 (s, 1H), 1.77 – 1.72 (m, 2H), 1.25 – 1.03 (m, 3H), 0.84 (t,  $J = 7.1$  Hz, 4H).  $^{13}\text{C-NMR}$  (75 MHz,  $\text{CDCl}_3$ )  $\delta$  171.54, 162.66, 156.91, 145.34, 130.17, 129.90, 128.60, 124.18, 123.26, 122.75, 122.26, 94.27, 54.16, 45.29, 33.43, 16.49, 14.11. **FTIR** (KBr)  $\text{cm}^{-1}$ : 3443, 3334, 3209, 2928, 2851, 2185, 1745, 1652, 1614, 1510, 1408, 1252, 1162, 961, 825. **HRMS-ESI**:  $[\text{M}+\text{Na}]^+$ , calcd for  $\text{C}_{17}\text{H}_{14}\text{N}_2\text{NaO}_4$  387.0279, found 387.0285.

## 7. Crystallographic data

### Assignment of the absolute configuration of *syn*-**3i** by X-Ray Diffraction analysis:

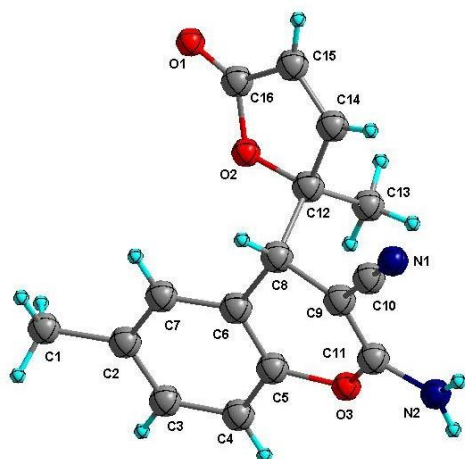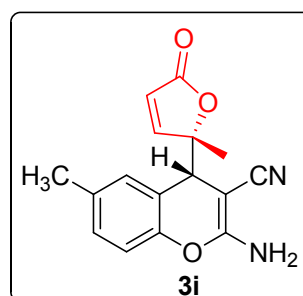

Identification code

**3i**

Empirical formula  $C_{16}H_{14}N_2O_3$

Density (calculated)  $1.369 \text{ g/cm}^3$

Formula weight 282.29

Absorption coefficient  $0.096 \text{ mm}^{-1}$

Temperature 305(2)

F(000) 296.0

Wavelength  $0.71073 \text{ \AA}$

Crystal size  $0.21 \times 0.19 \times 0.17 \text{ mm}^3$

Crystal system Triclinic

Theta range for data collection  $2.622 \text{ to } 28.458^\circ$

Space group P -1

Index ranges  $-8 \leq h \leq 8$ ,  
 $-10 \leq k \leq 10$ ,  
 $-19 \leq l \leq 19$

Unit cell dimensions  $a = 6.158(5) \text{ \AA}$ ,  
 $\alpha = 79.963(15)^\circ$

Reflections collected 21232

$b = 7.899(6) \text{ \AA}$ ,  
 $\beta = 87.426(16)^\circ$

Completeness to theta  $99.4\%$   
 $= 25.00^\circ$

$c = 14.325(10) \text{ \AA}$ ,  
 $\gamma = 86.68(2)^\circ$

R indices (all data)  $R1 = 0.1088$ ,  $wR2 = 0.1934$

|        |                         |      |         |
|--------|-------------------------|------|---------|
| Volume | 684.5(9) Å <sup>3</sup> | CCDC | 1889051 |
| Z      | 2                       |      |         |

## 8. References

1. (a) Li, H.; Wang, Y.; Tang, L.; Deng, L. *J. Am. Chem. Soc.* **2004**, *126*, 9906. (b) Li, H.; Wang, Y.; Tang, L.; Wu, F.; Liu, X. Guo, C.; Foxman, B. M.; Deng, L. *Angew. Chem. Int. Ed.* **2005**, *44*, 105. (c) Song, J.; Wang, Y.; Deng, L. *J. Am. Chem. Soc.* **2006**, *128*, 6048. (d) Wang, Y.; Li, H.; Wang, Y.-Q.; Liu, Y.; Foxman, B. M.; Deng, L. *J. Am. Chem. Soc.* **2007**, *129*, 6364. (e) Singh, R. P.; Foxman, B. M.; Deng, L. *J. Am. Chem. Soc.* **2010**, *132*, 9558.
2. Li, W.; Liu, H.; Jiang, X.; Wang, J. *ACS Catal.* **2012**, *2*, 1535.

## 9. <sup>1</sup>H and <sup>13</sup>C Spectra of Compounds

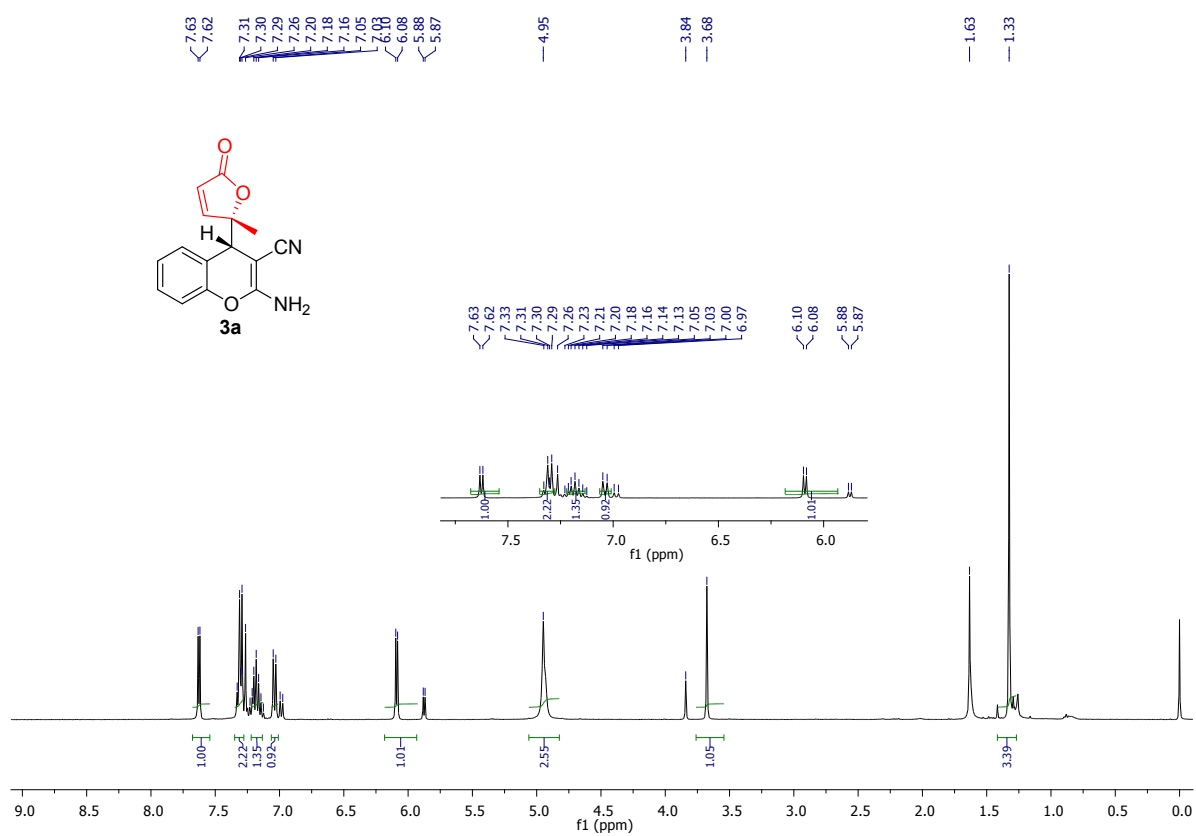

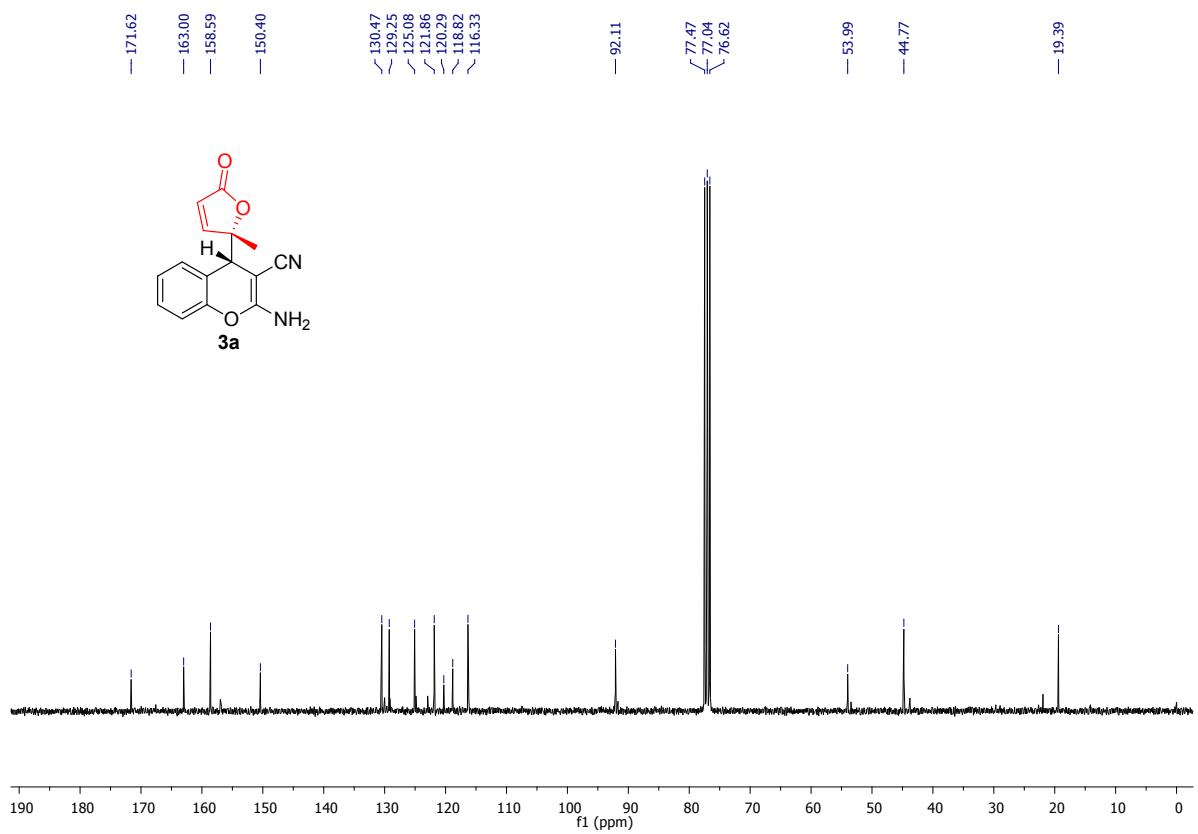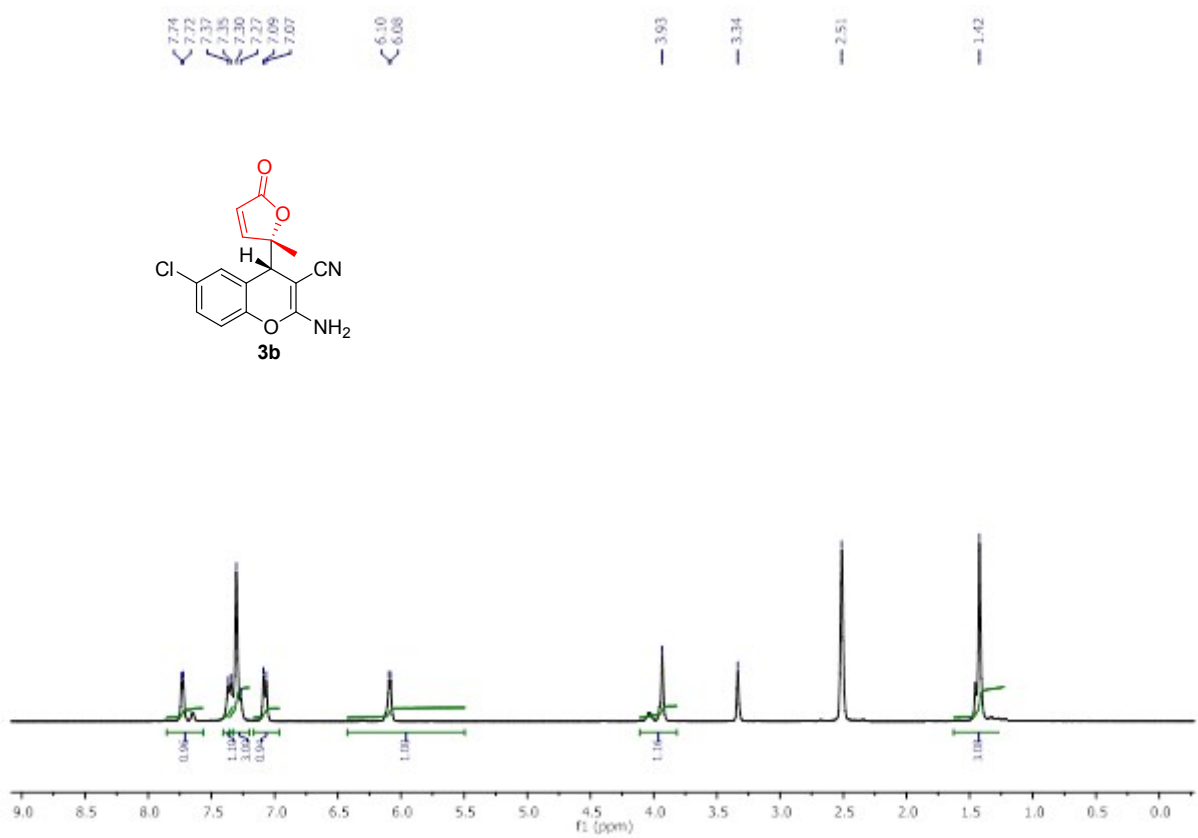



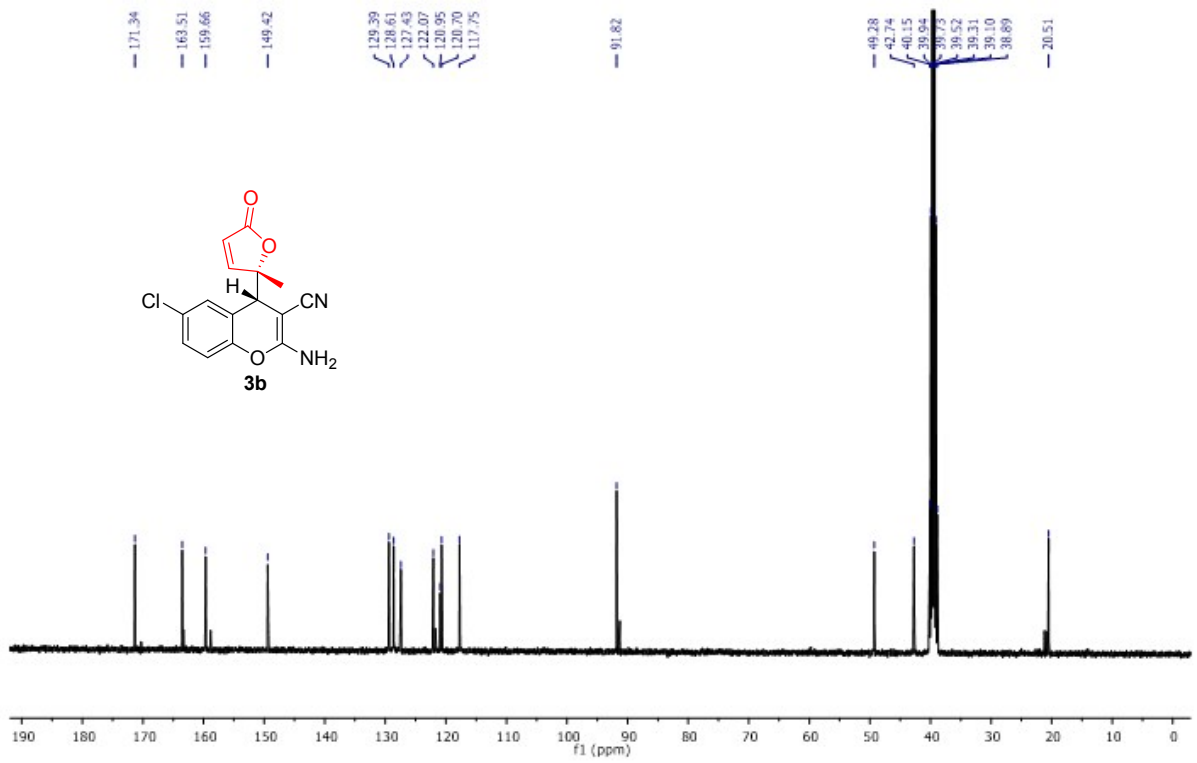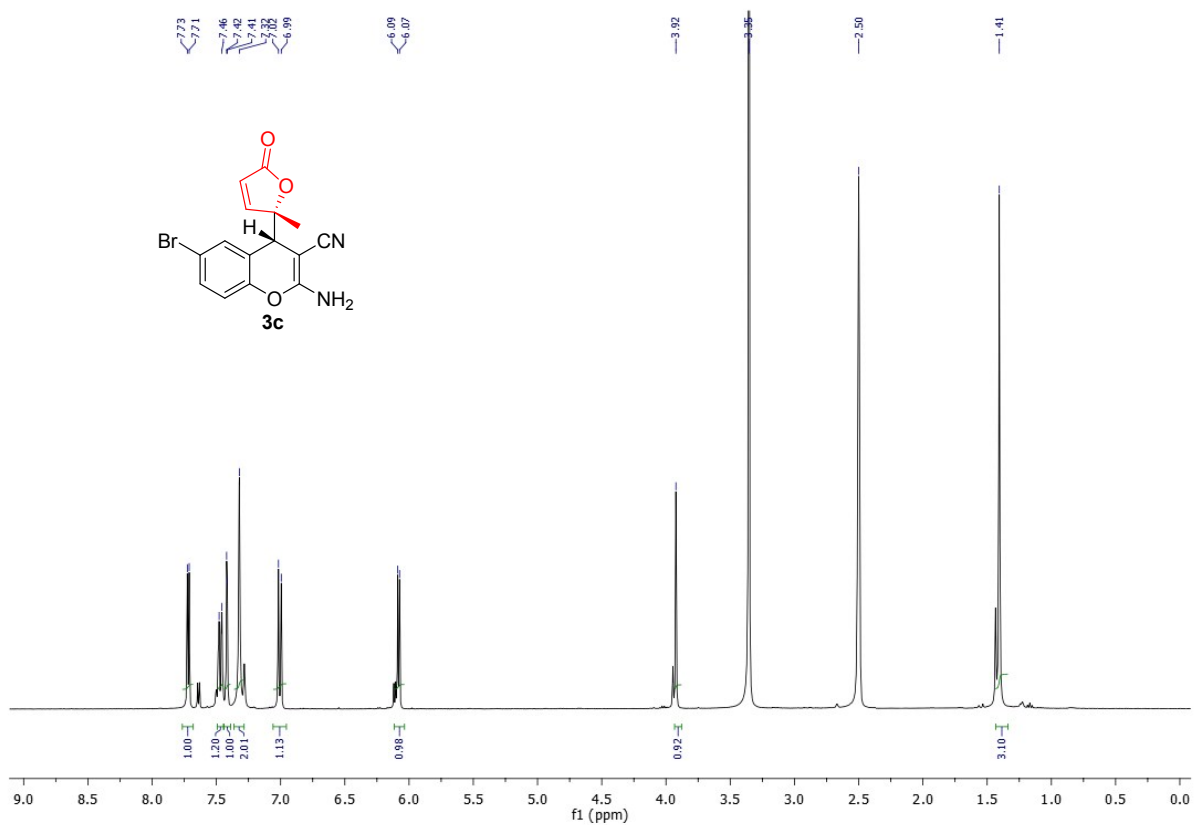

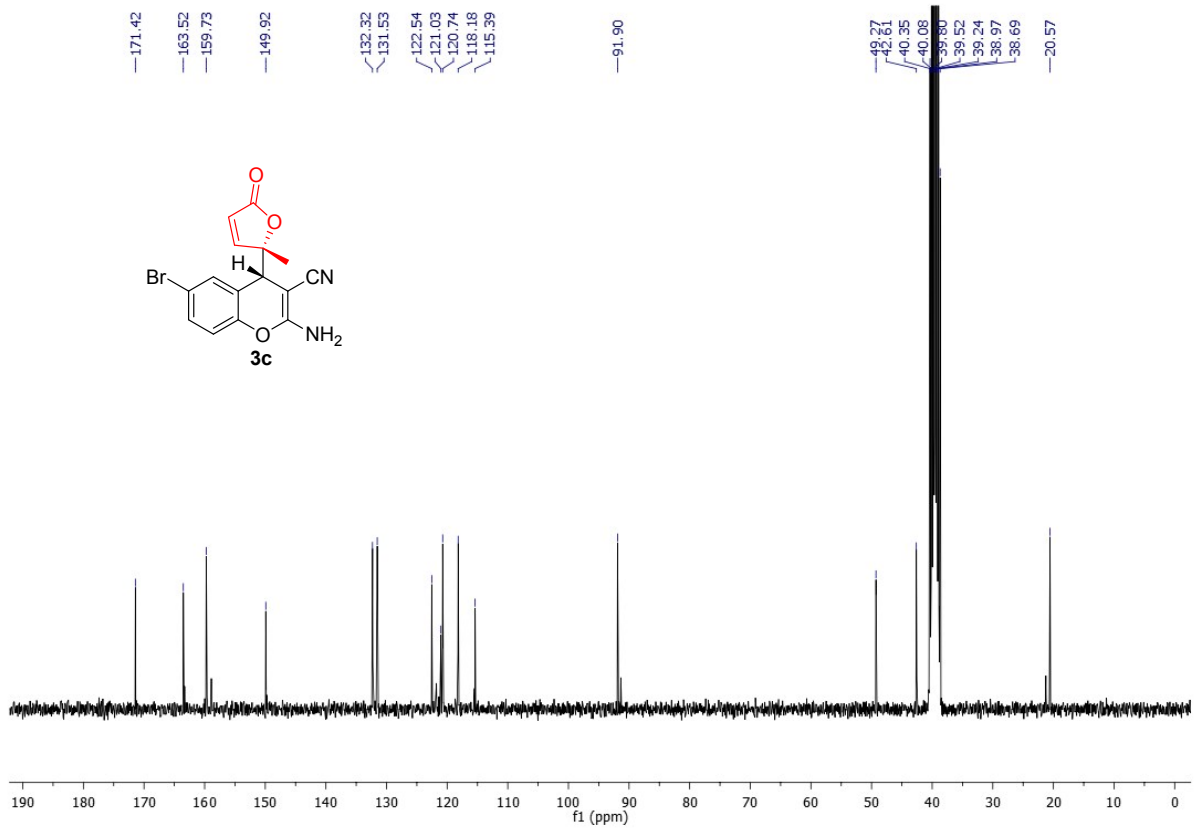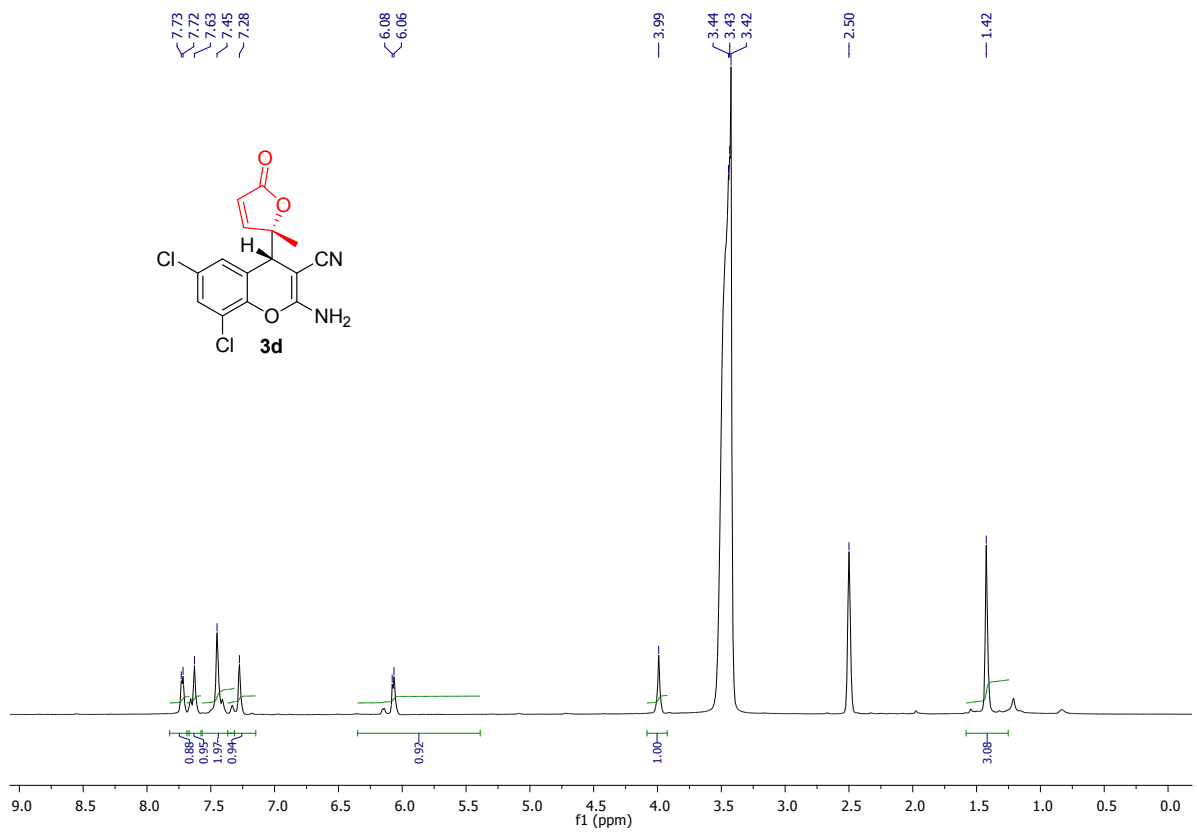

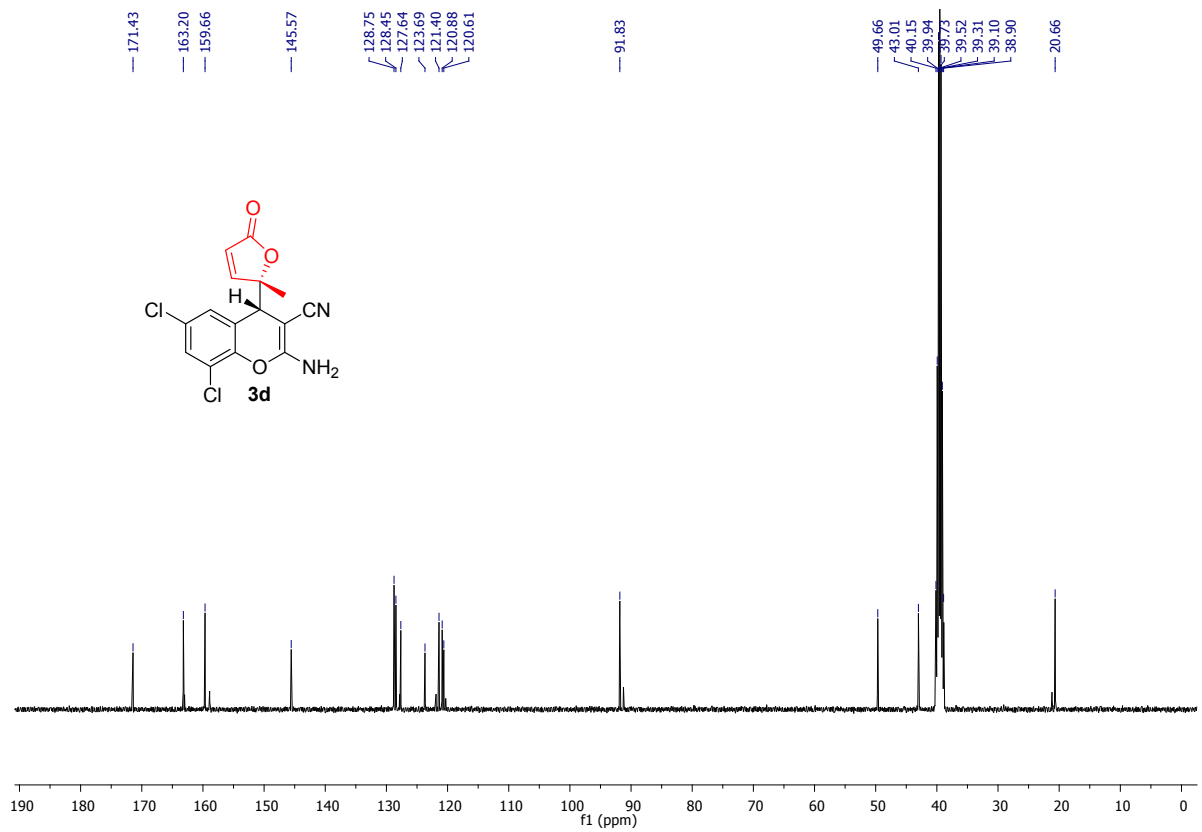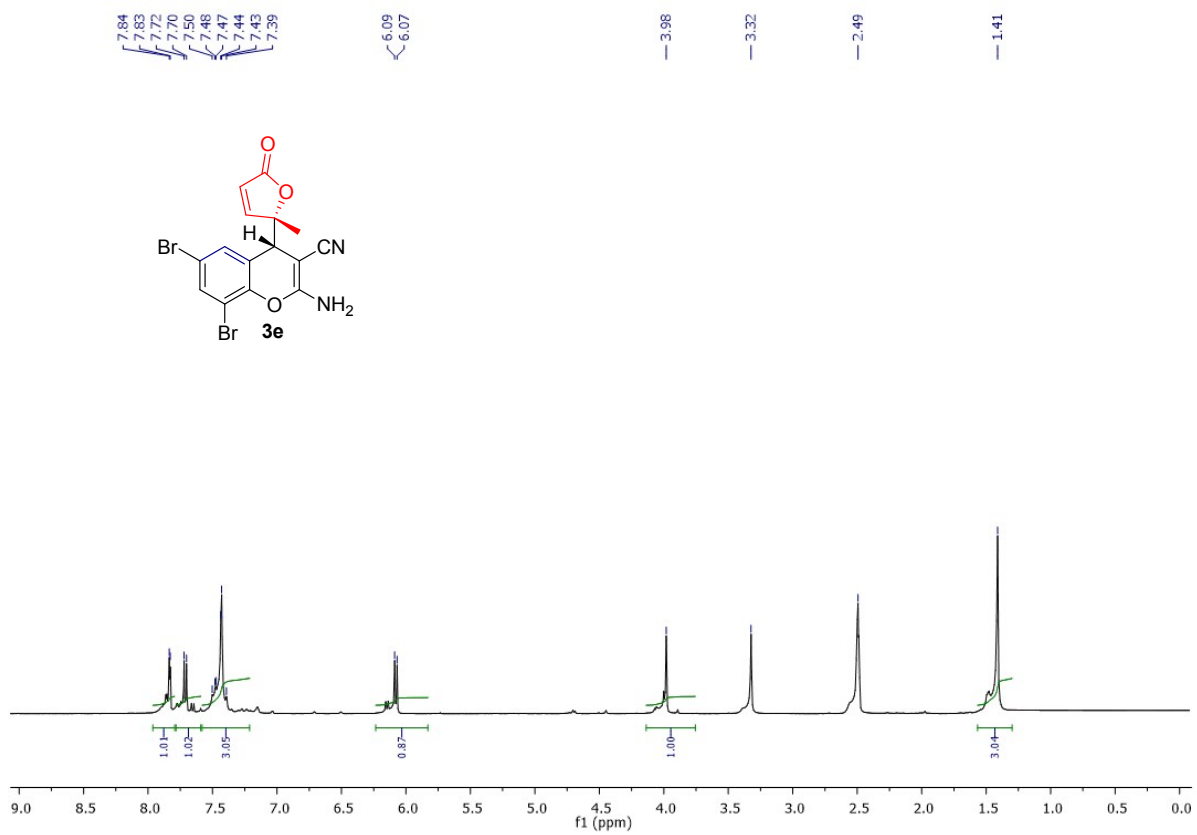

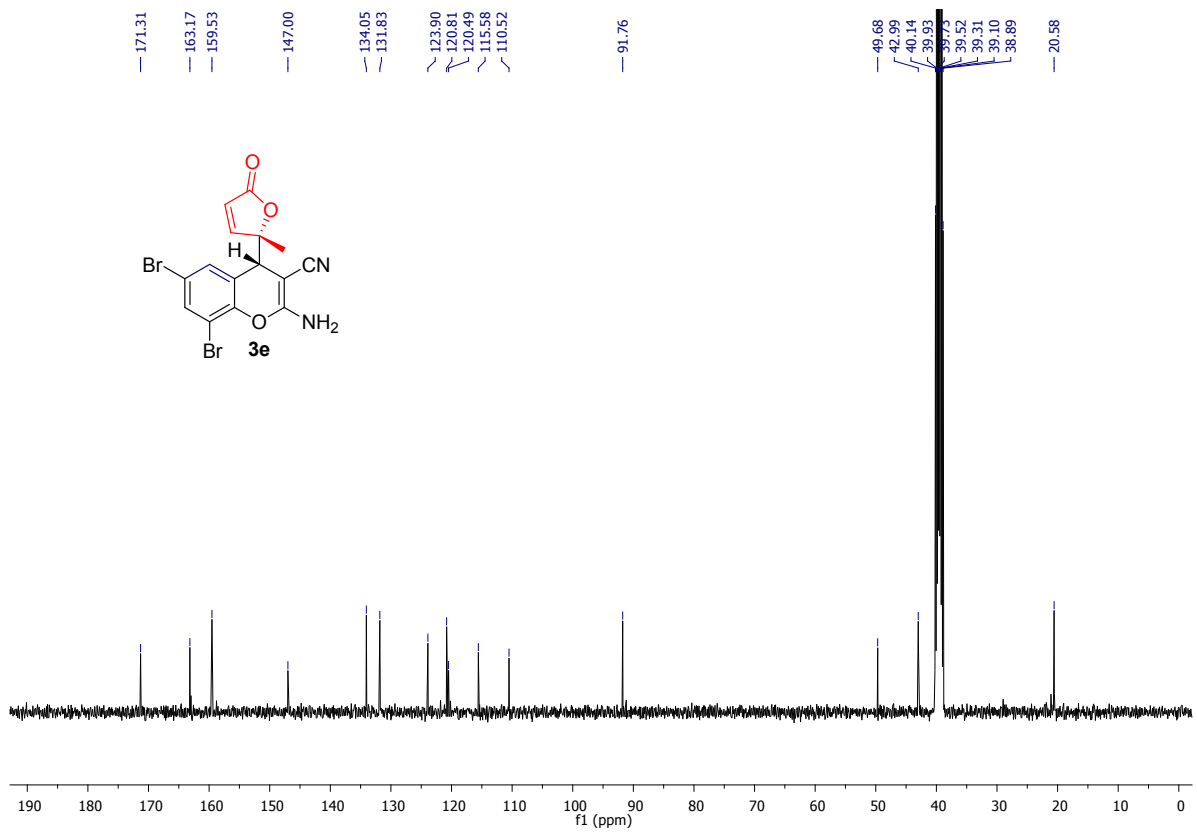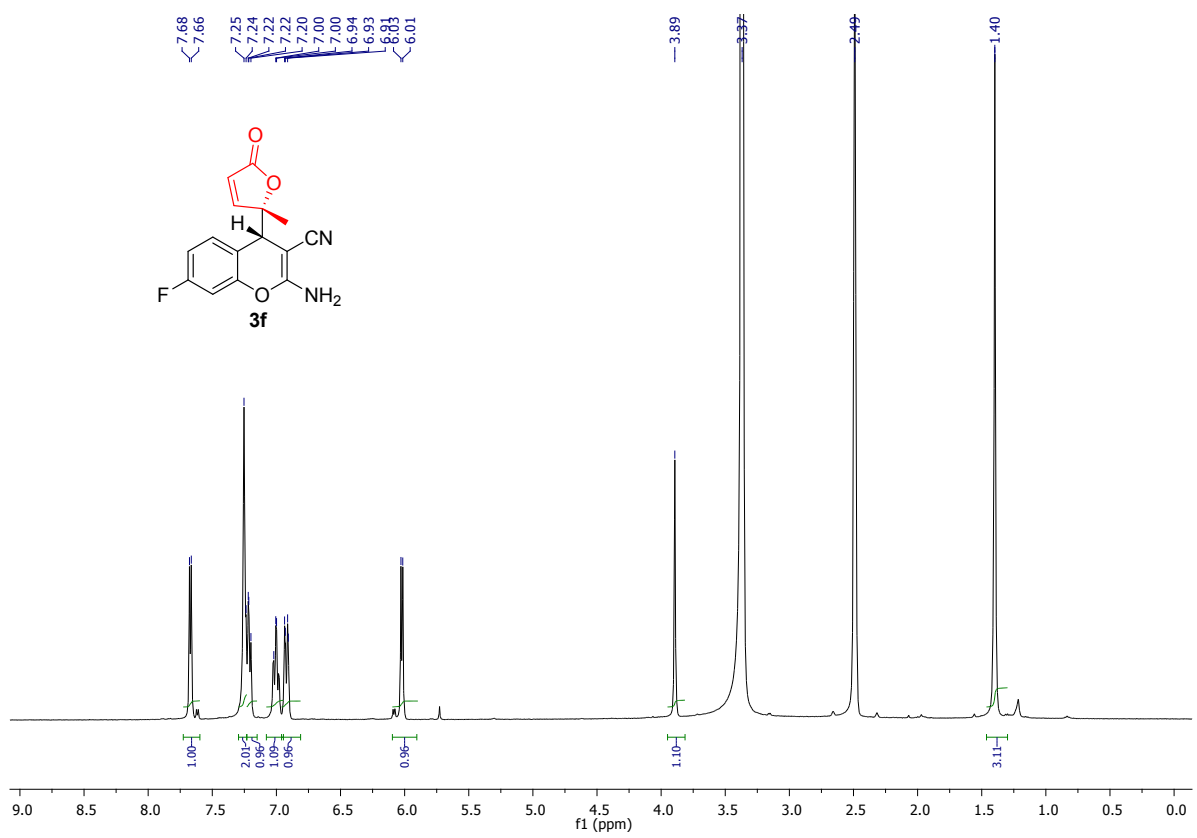

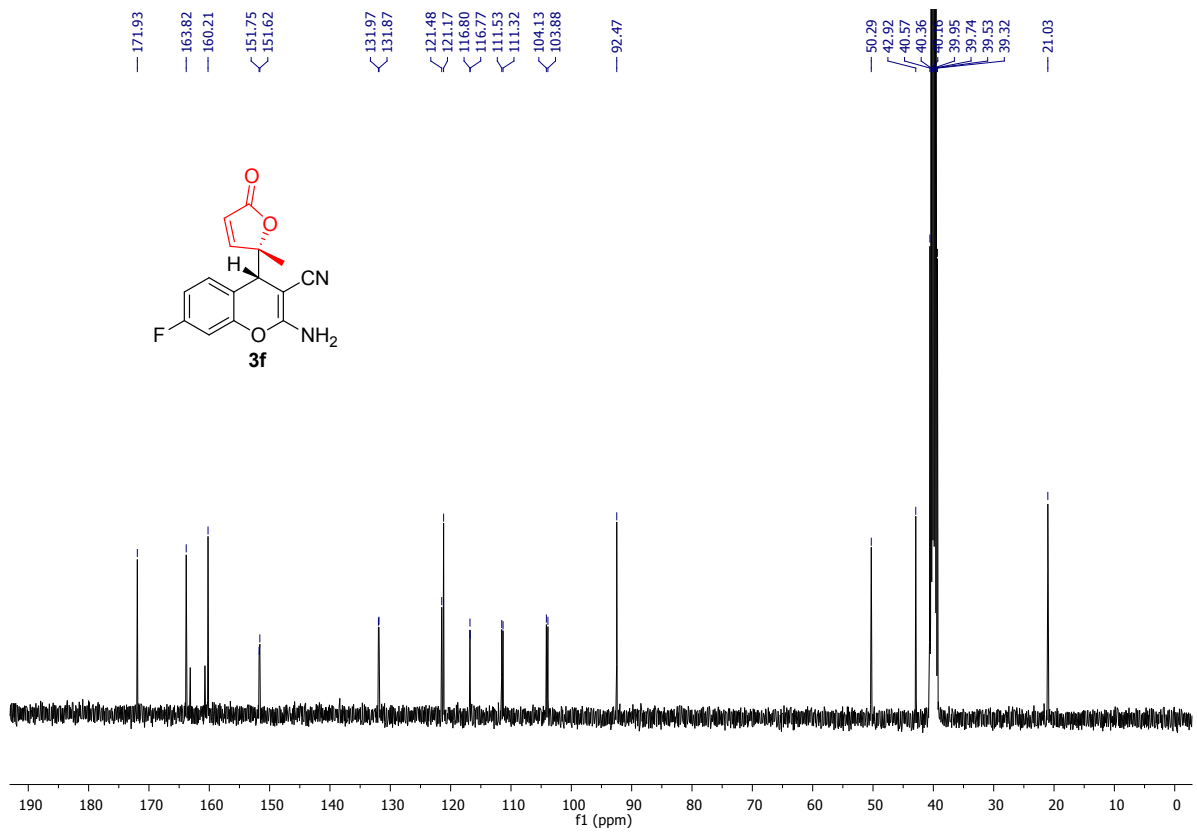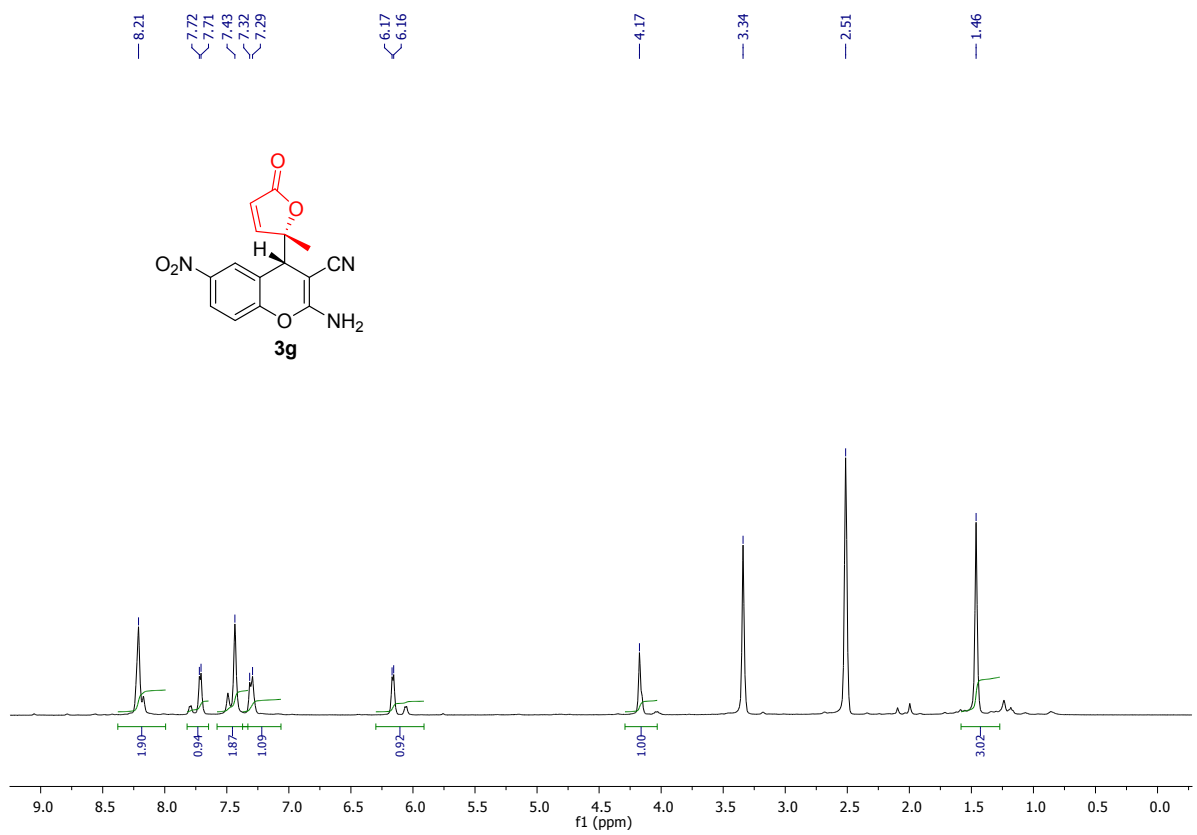

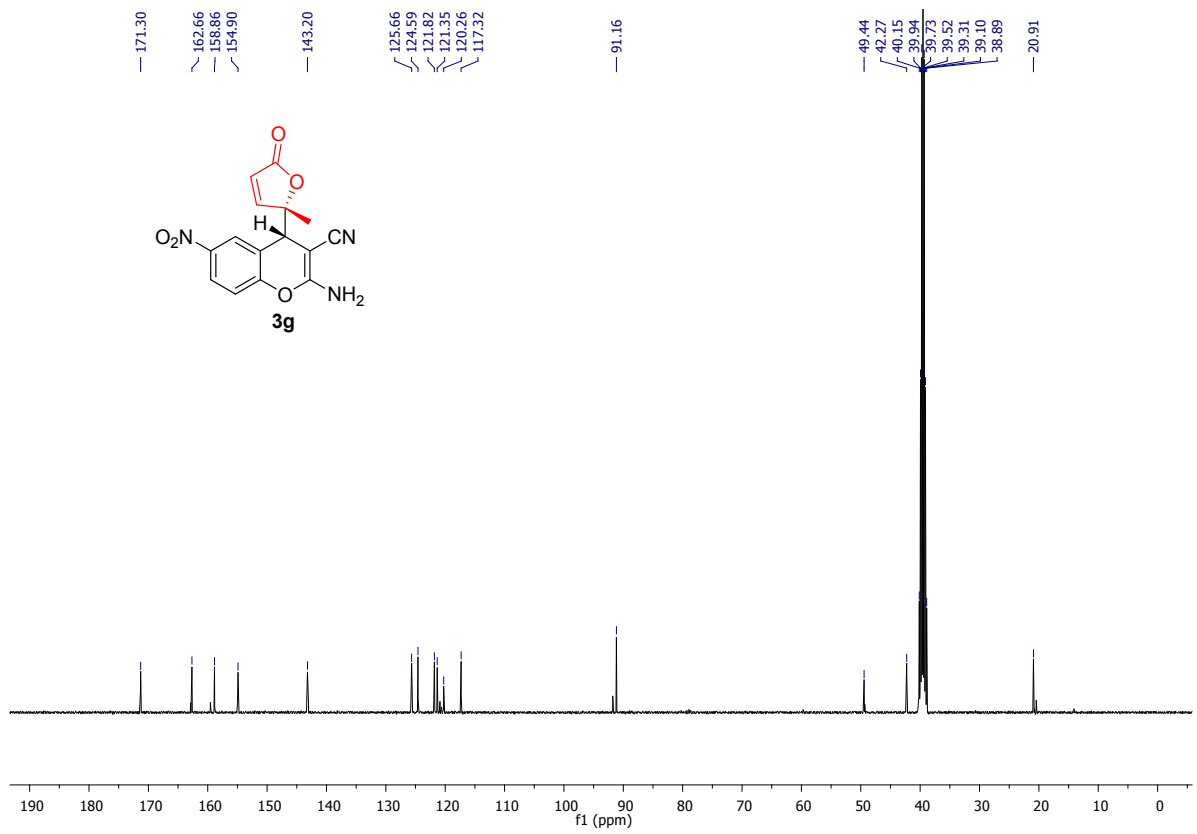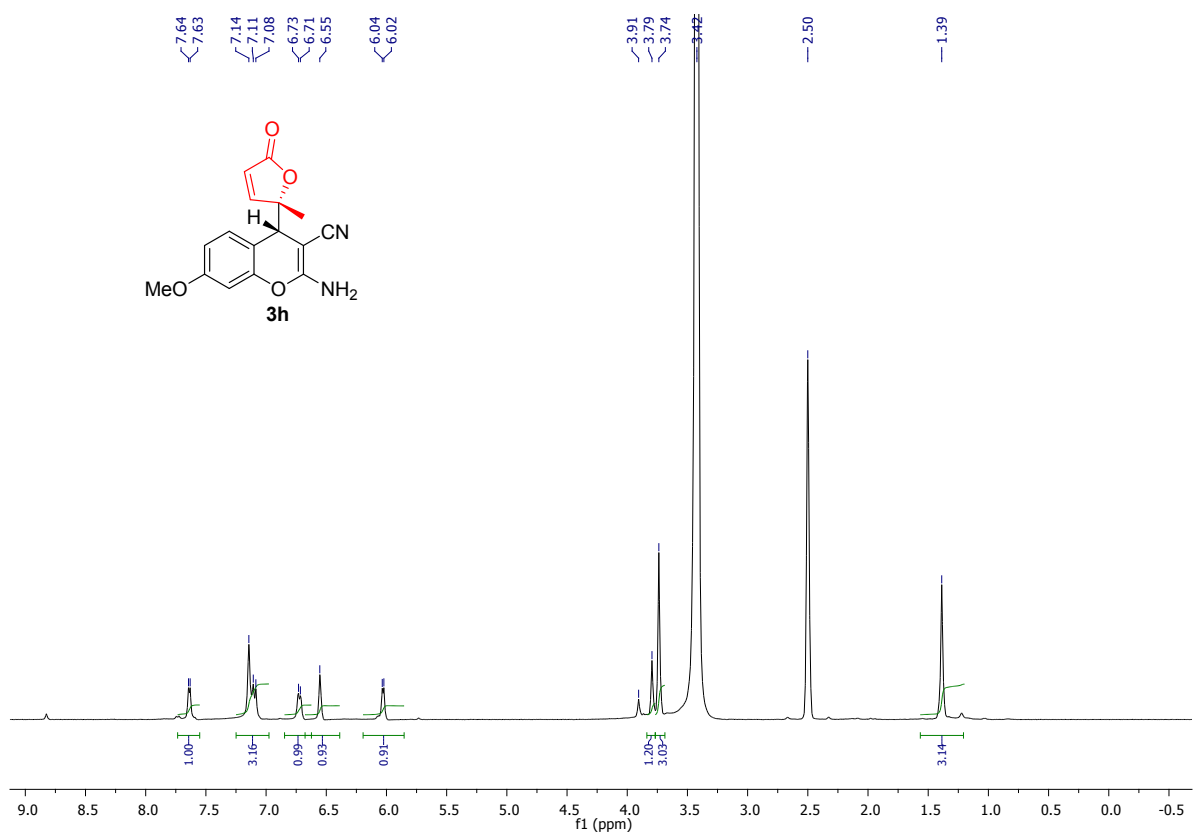

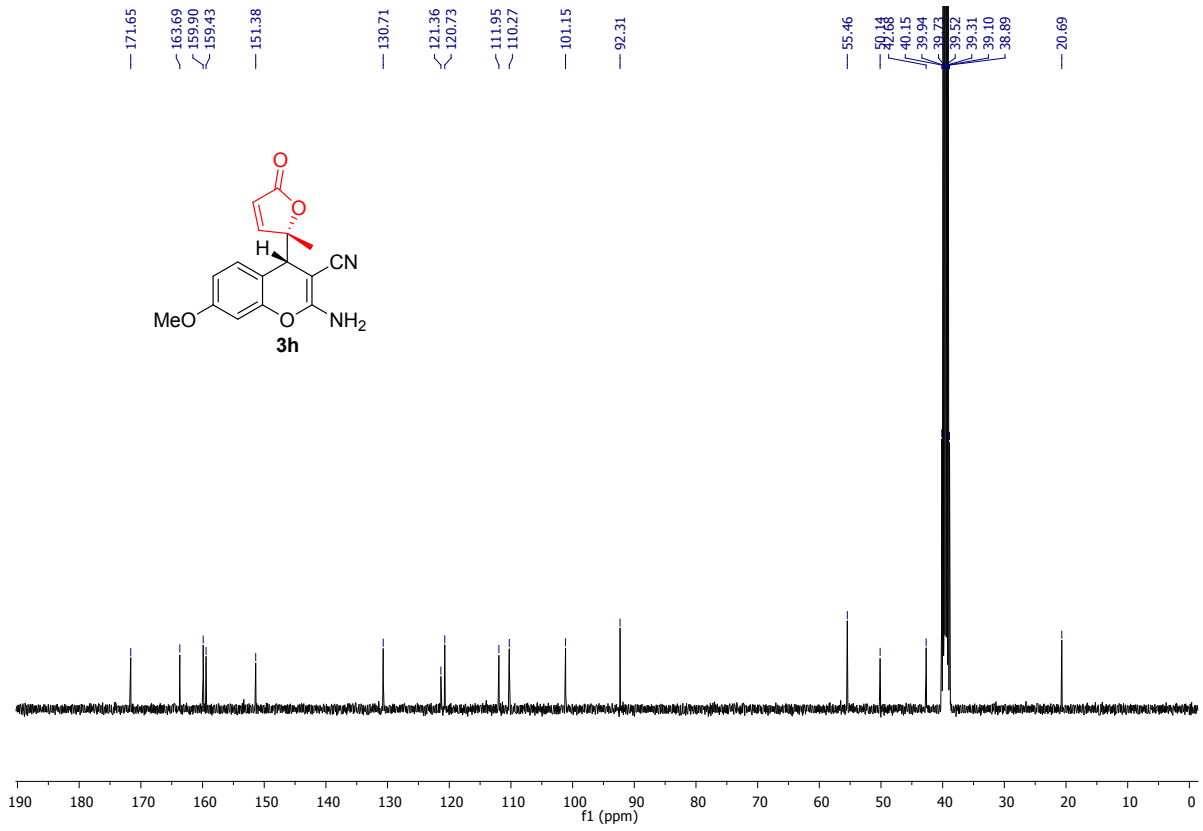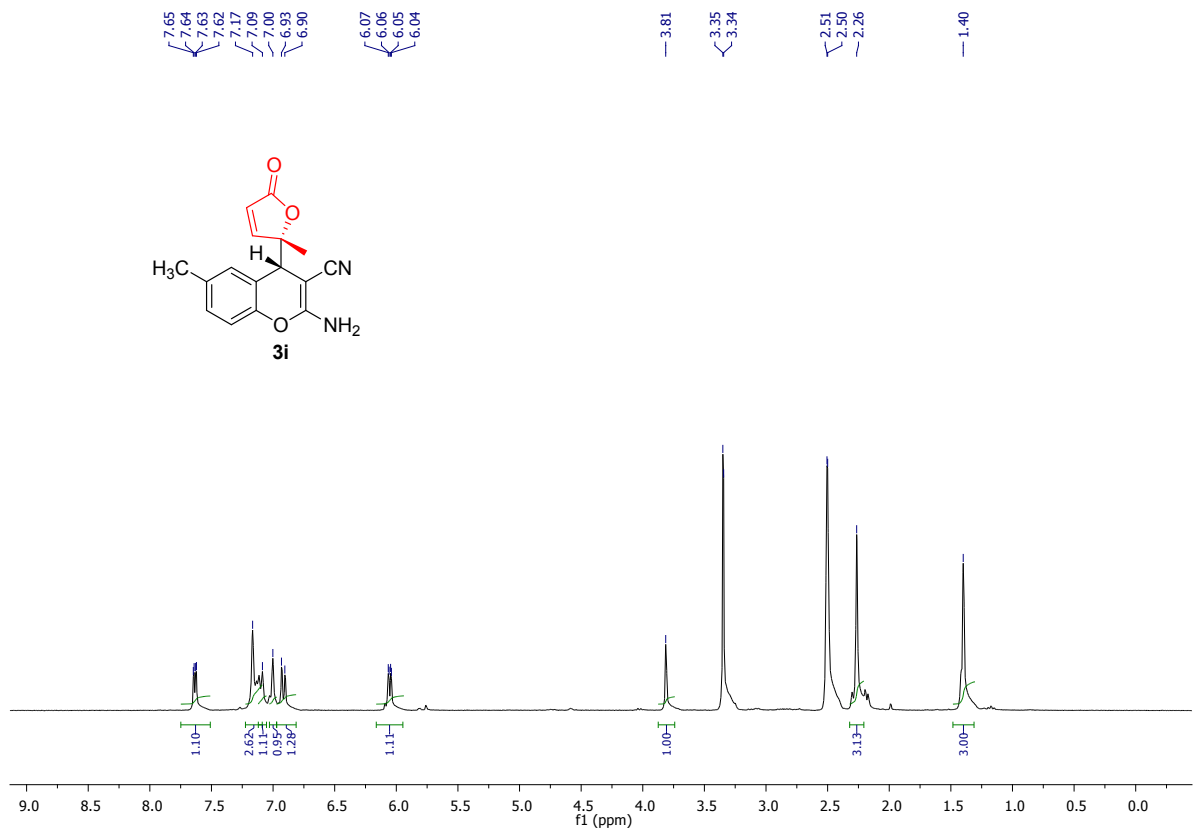

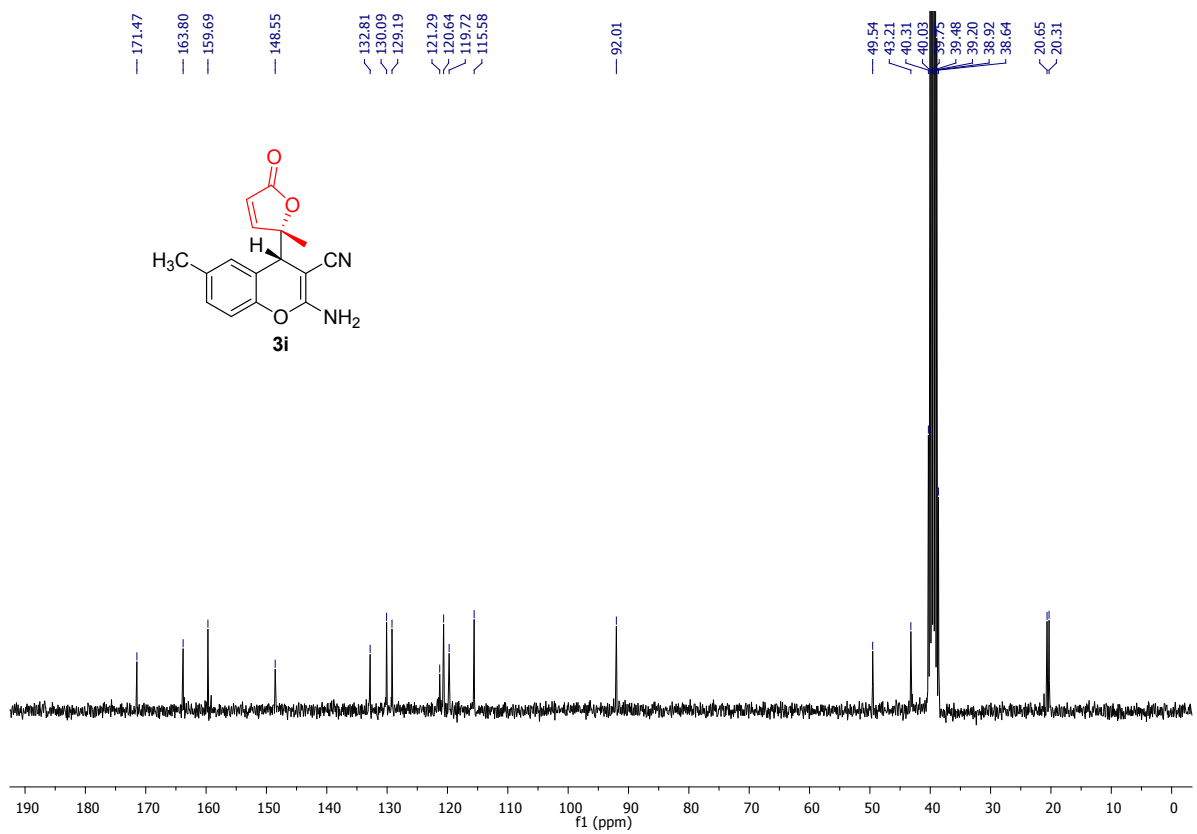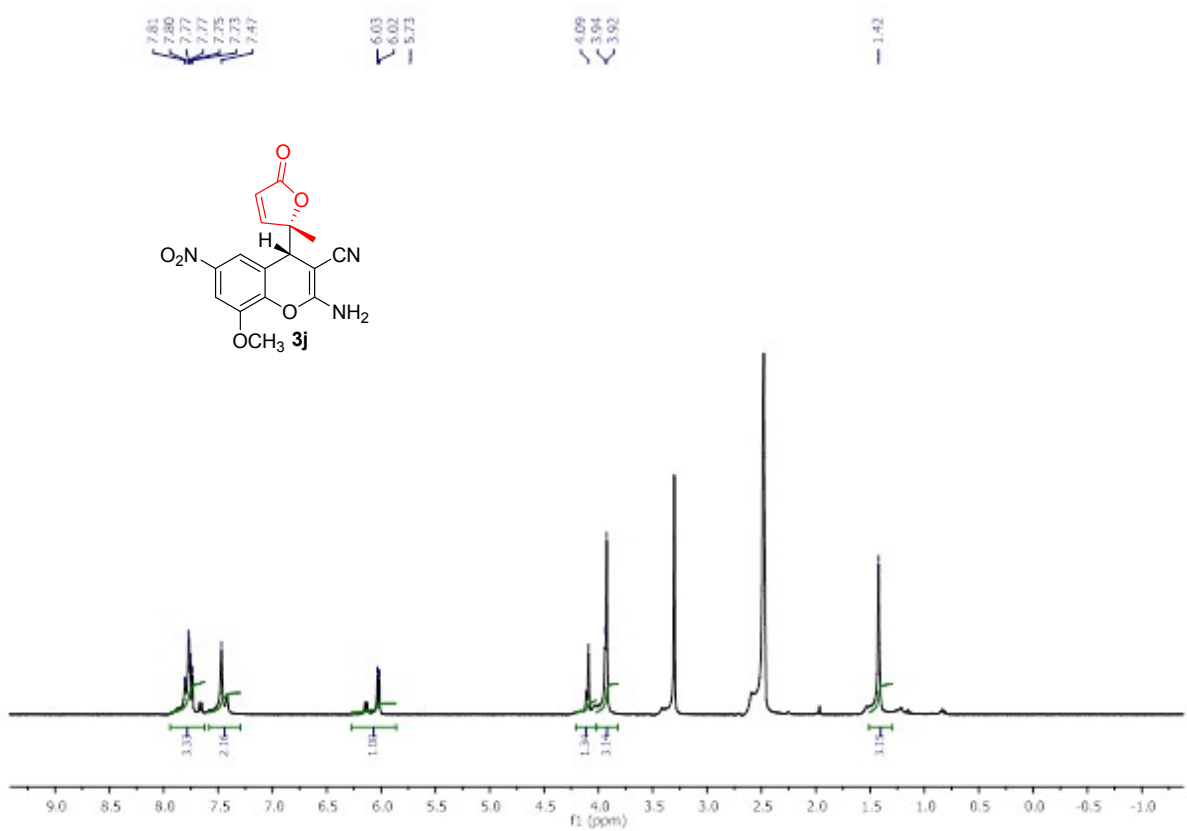



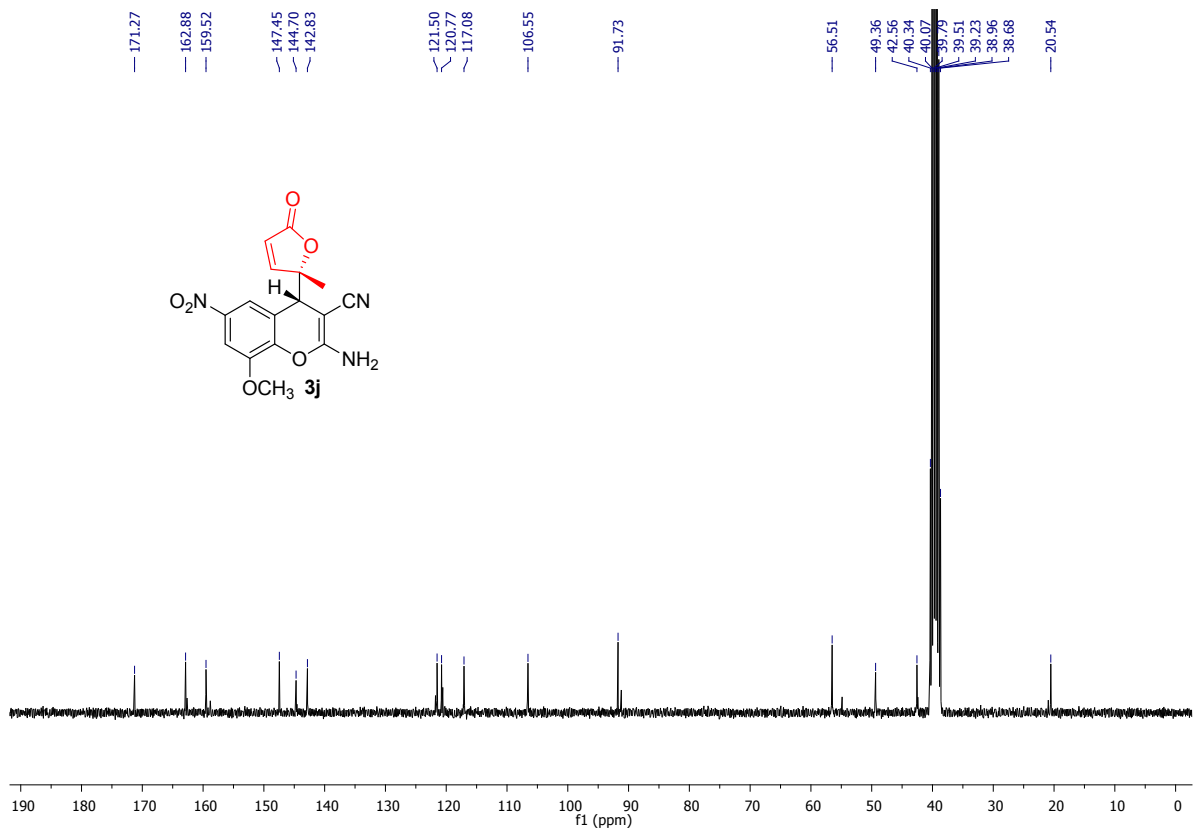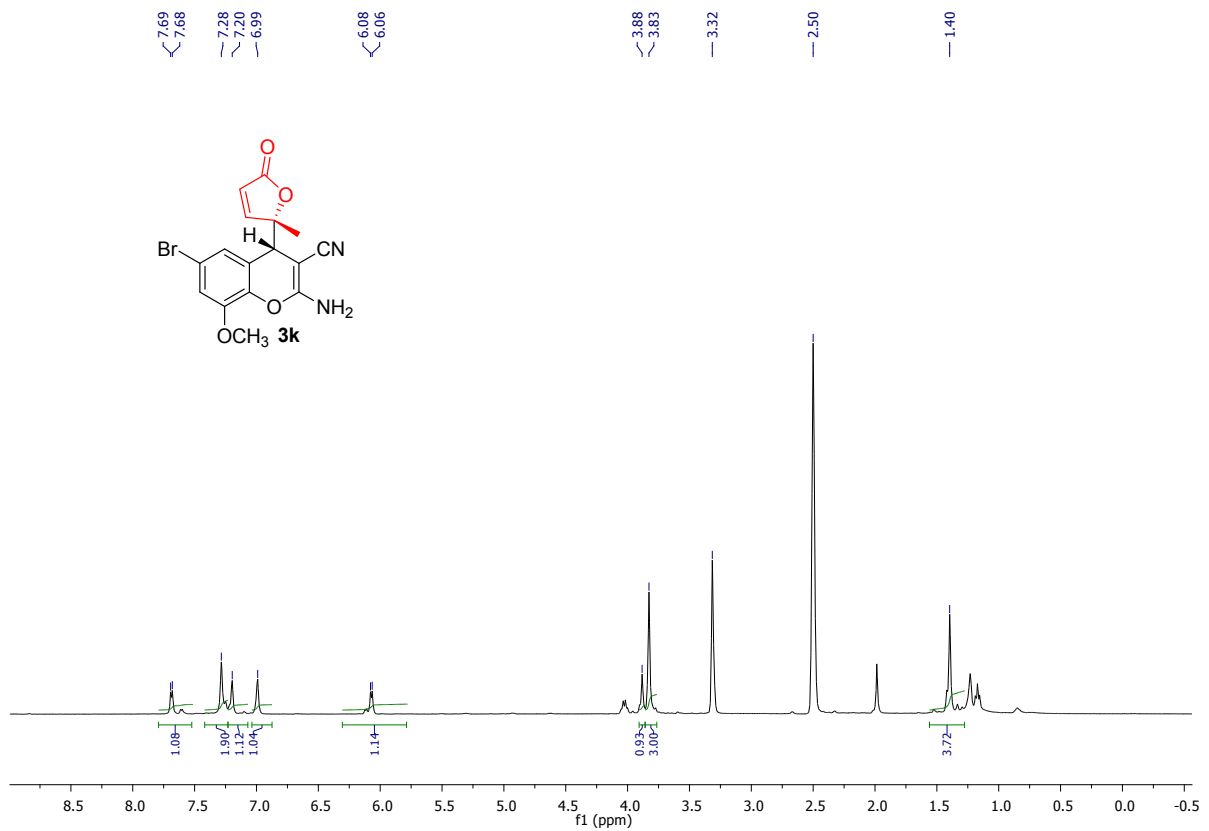

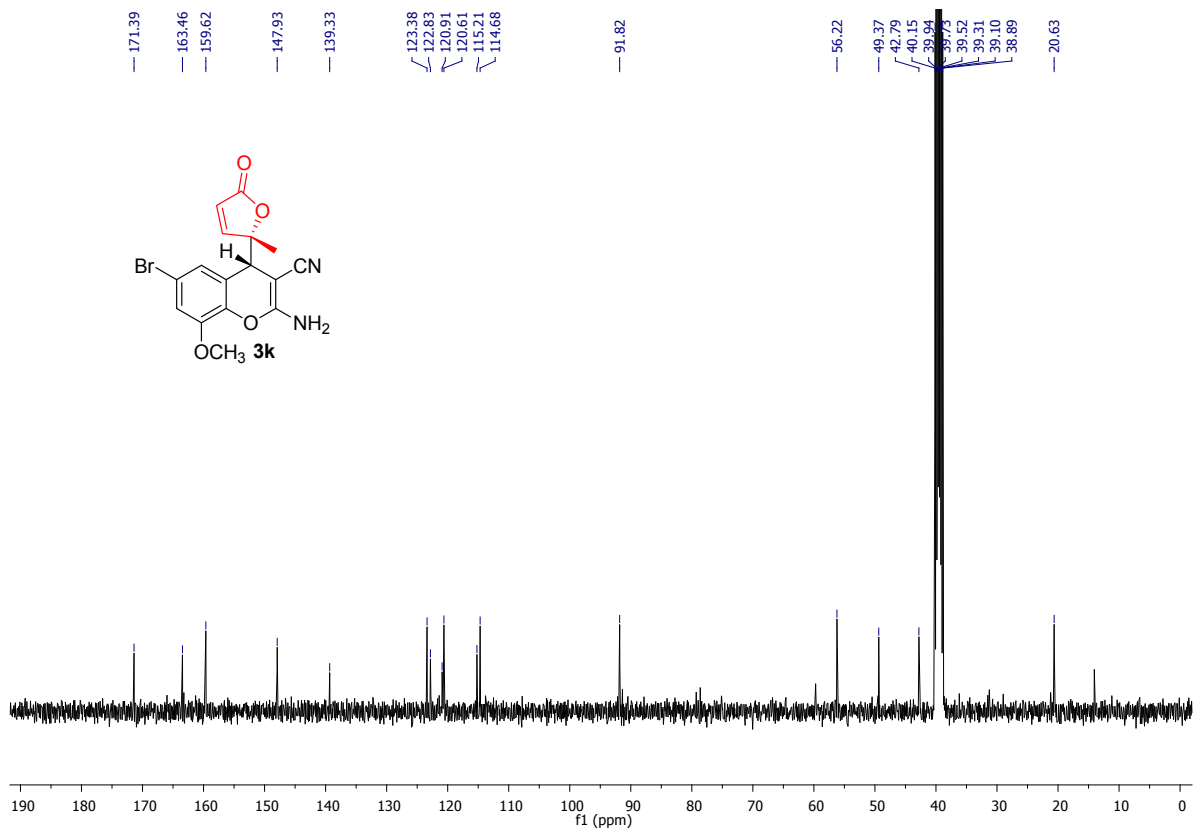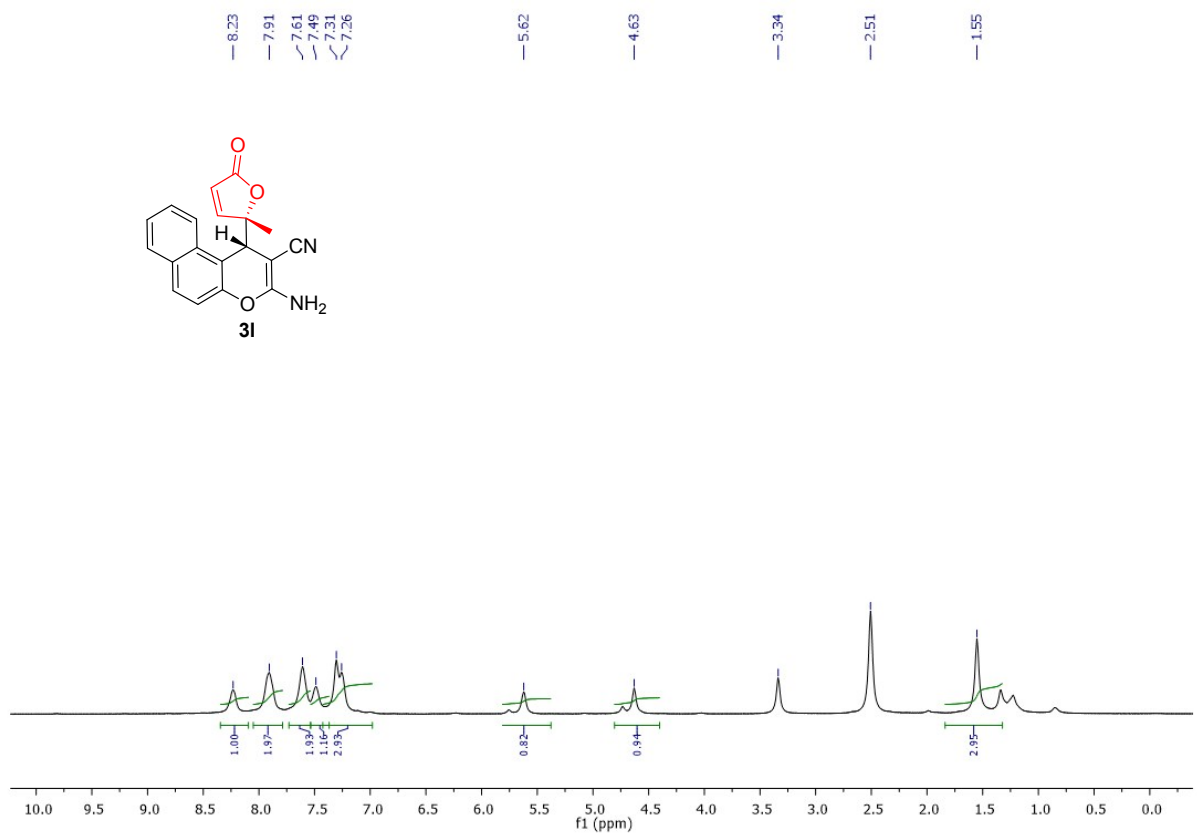

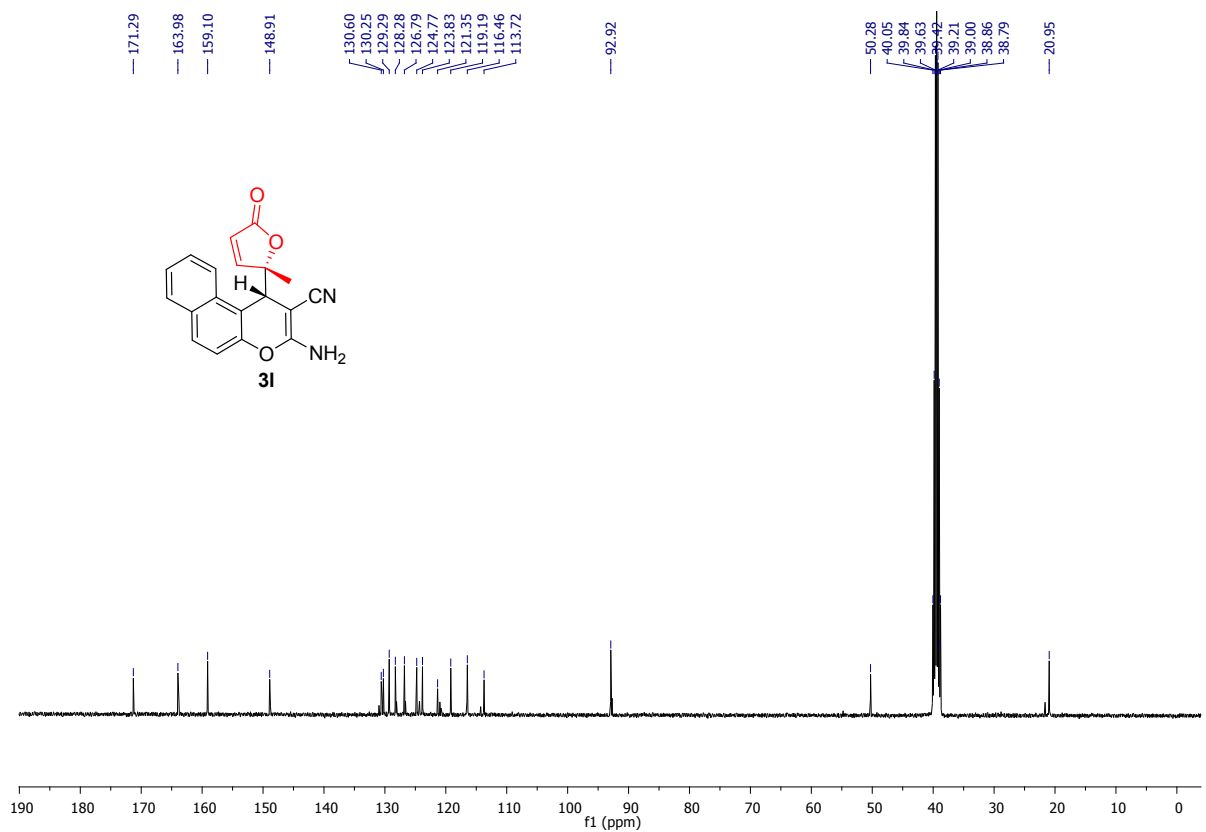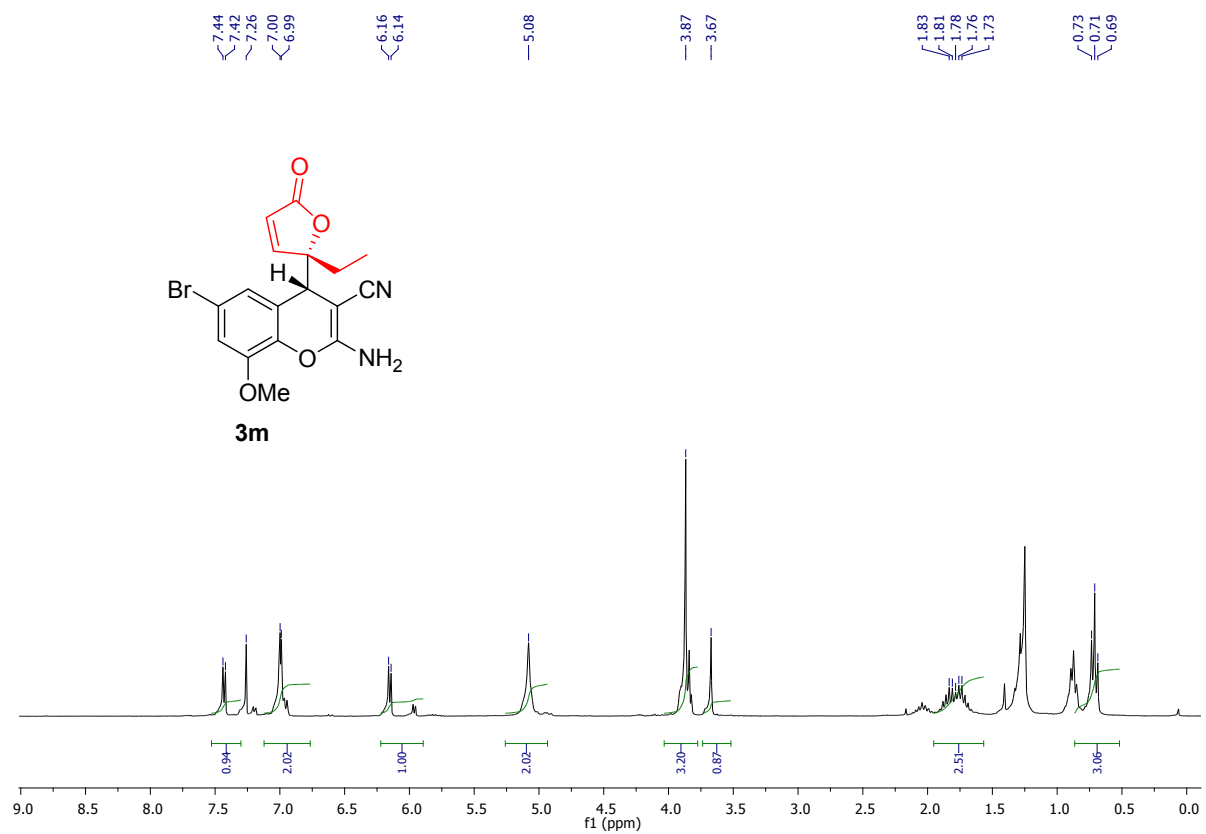

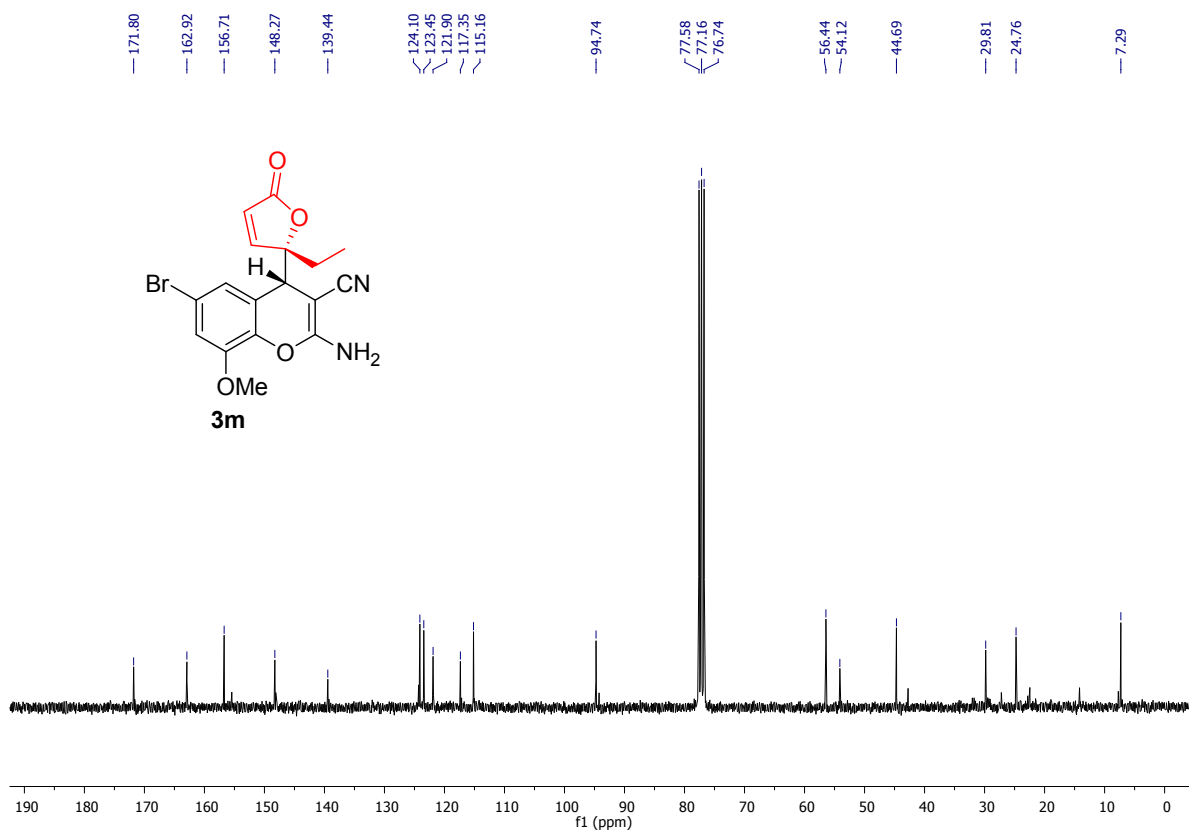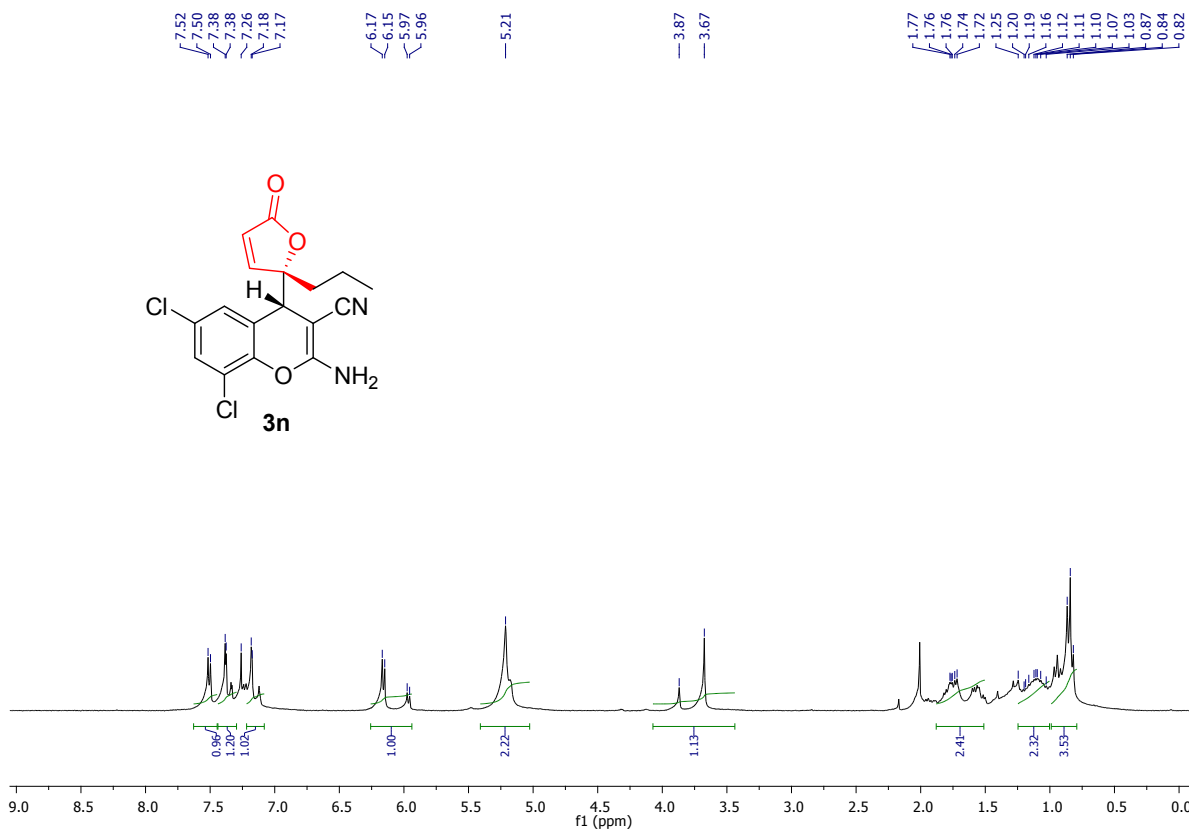

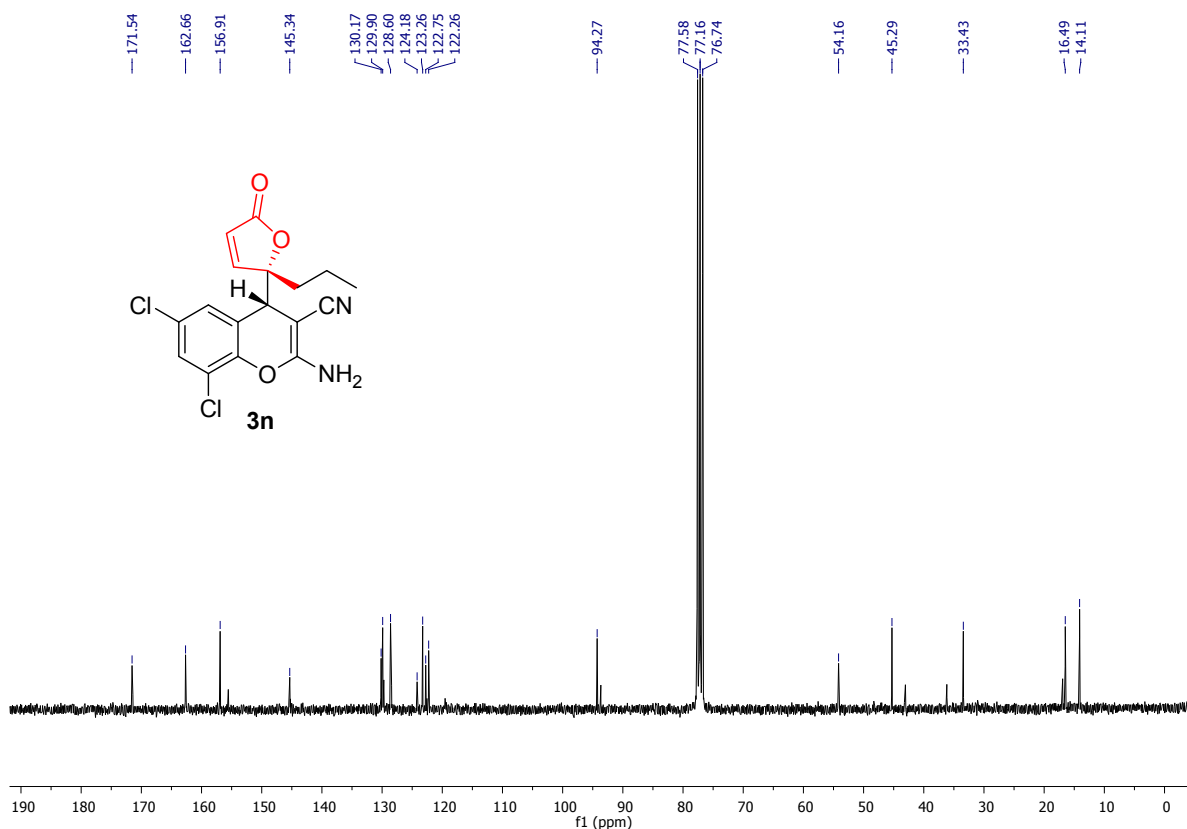

## 10. HPLC Spectra of Compounds

HPLC, Chiralpak ID, hexanes: isopropanol = 8:2, 1.0 mL/min,  $\lambda = 254$  nm.

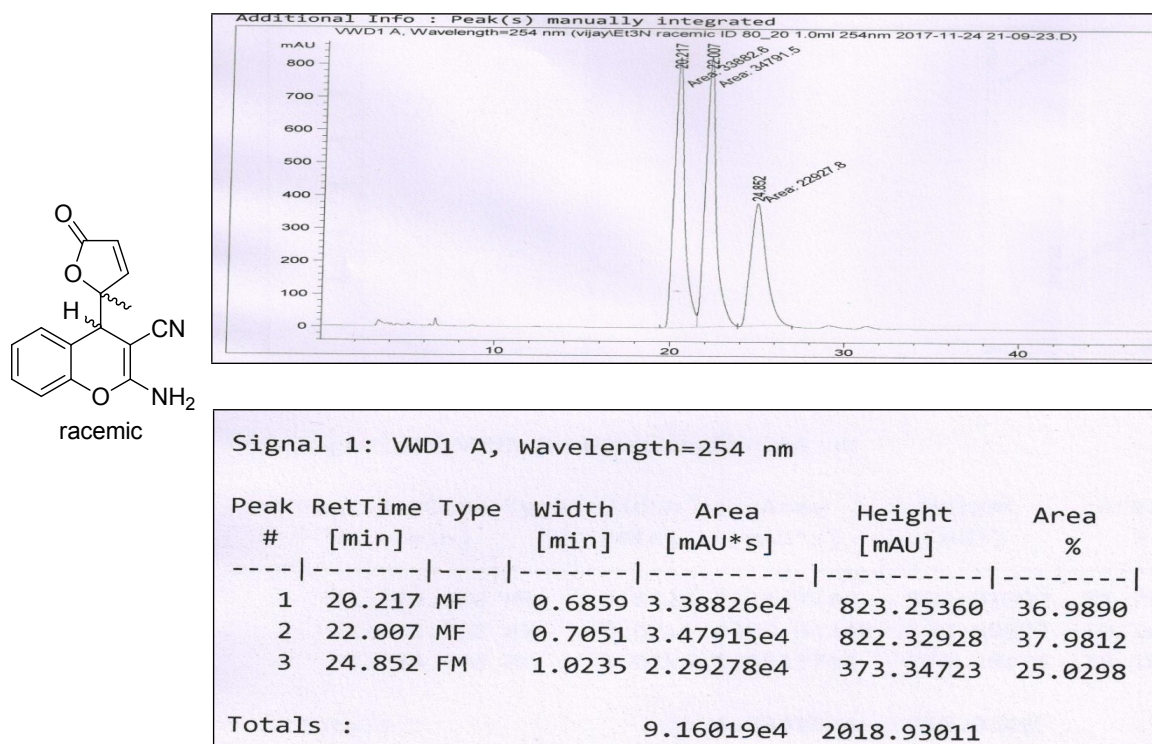

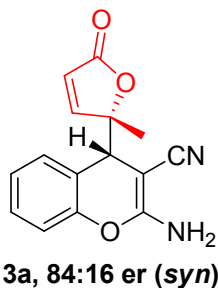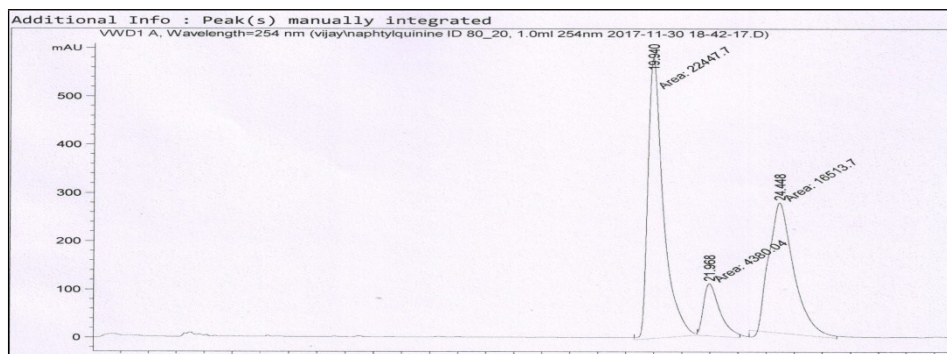

Signal 1: VWD1 A, Wavelength=254 nm

| Peak #   | RetTime [min] | Type | Width [min] | Area [mAU*s] | Height [mAU] | Area %  |
|----------|---------------|------|-------------|--------------|--------------|---------|
| 1        | 19.940        | MM   | 0.6428      | 2.24477e4    | 582.03992    | 51.7928 |
| 2        | 21.968        | MM   | 0.6716      | 4380.04248   | 108.69023    | 10.1059 |
| 3        | 24.448        | MM   | 1.0186      | 1.65137e4    | 270.20474    | 38.1014 |
| Totals : |               |      |             | 4.33415e4    | 960.93489    |         |

HPLC, Chiralpak ID, hexanes: isopropanol = 8:2, 1.0 mL/min,  $\lambda = 254$  nm.

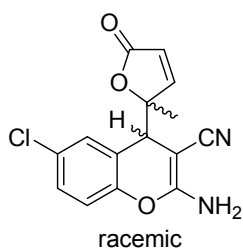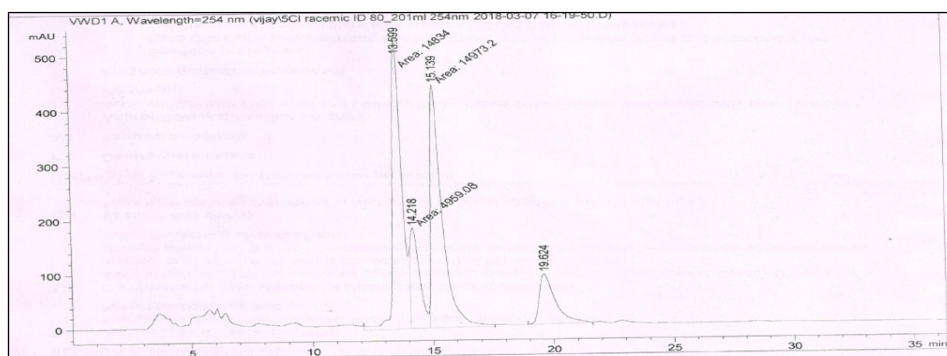

Signal 1: VWD1 A, Wavelength=254 nm

| Peak # | RetTime [min] | Type | Width [min] | Area [mAU*s] | Height [mAU] | Area %  |
|--------|---------------|------|-------------|--------------|--------------|---------|
| 1      | 13.599        | MF   | 0.4682      | 1.48340e4    | 528.09656    | 38.0662 |
| 2      | 14.218        | FM   | 0.4452      | 4959.07568   | 185.64545    | 12.7257 |
| 3      | 15.139        | FM   | 0.5594      | 1.49732e4    | 446.12991    | 38.4234 |
| 4      | 19.624        | BB   | 0.6666      | 4202.70264   | 91.88905     | 10.7847 |

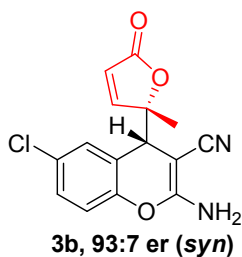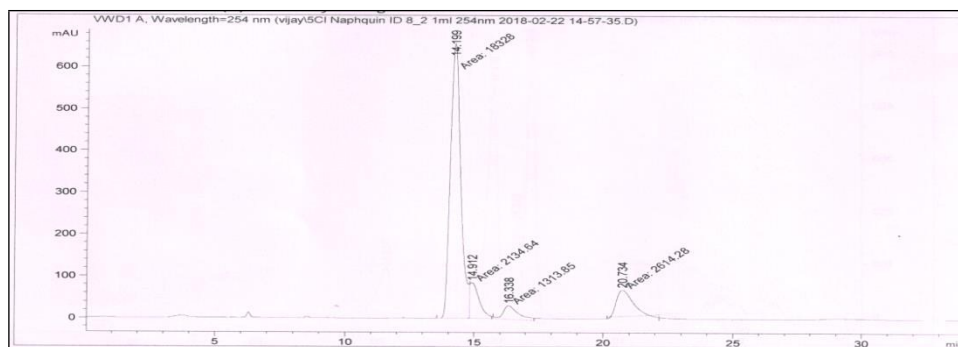

Signal 1: VWD1 A, Wavelength=254 nm

| Peak # | RetTime [min] | Type | Width [min] | Area [mAU*s] | Height [mAU] | Area %  |
|--------|---------------|------|-------------|--------------|--------------|---------|
| 1      | 14.199        | MF   | 0.4662      | 1.83280e4    | 655.27032    | 75.1432 |
| 2      | 14.912        | FM   | 0.4215      | 2134.63794   | 84.41354     | 8.7518  |
| 3      | 16.338        | MM   | 0.6834      | 1313.85315   | 32.04145     | 5.3867  |
| 4      | 20.734        | MM   | 0.7032      | 2614.28003   | 61.96589     | 10.7183 |

HPLC, Chiralpak ID, hexanes: isopropanol = 8:2, 1.0 mL/min,  $\lambda = 254$  nm.

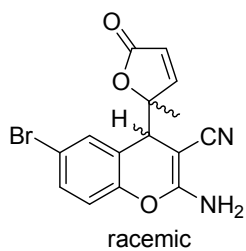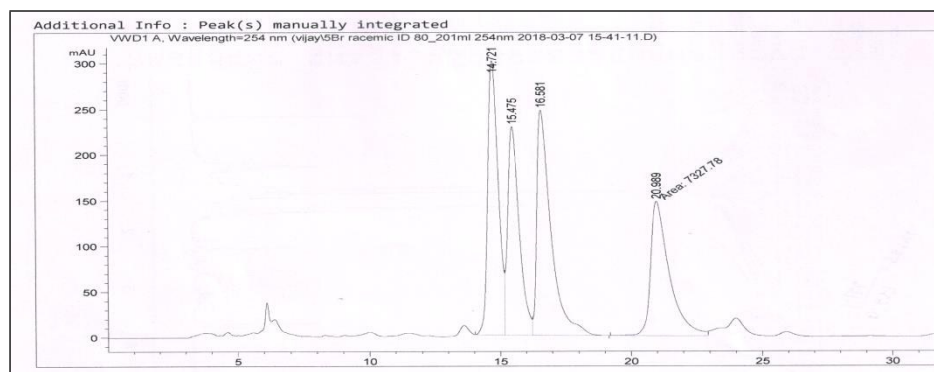

Signal 1: VWD1 A, Wavelength=254 nm

| Peak #   | RetTime [min] | Type | Width [min] | Area [mAU*s] | Height [mAU] | Area %  |
|----------|---------------|------|-------------|--------------|--------------|---------|
| 1        | 14.721        | BV   | 0.4329      | 8402.93652   | 299.90372    | 26.1806 |
| 2        | 15.475        | VV   | 0.4636      | 7077.09961   | 228.33879    | 22.0498 |
| 3        | 16.581        | VB   | 0.5514      | 9288.18066   | 246.61469    | 28.9387 |
| 4        | 20.989        | MF   | 0.8279      | 7327.78418   | 147.51198    | 22.8308 |
| Totals : |               |      |             | 3.20960e4    | 922.36917    |         |

Additional Info : Peak(s) manually integrated

VWD1 A, Wavelength=254 nm (vijay15Br Naphqu ID 8\_2 1ml 254nm 2018-02-22 21-14-50.D)

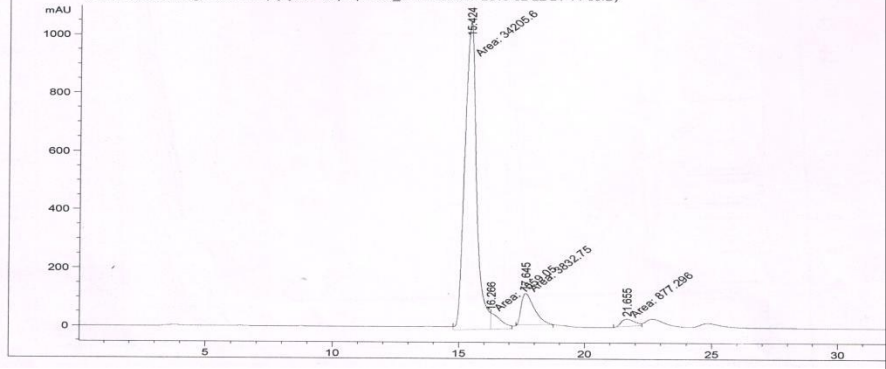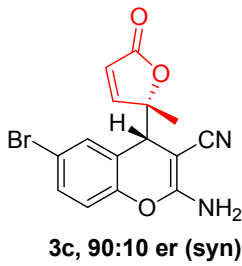

| Peak #   | RetTime [min] | Type | Width [min] | Area [mAU*s] | Height [mAU] | Area %  |
|----------|---------------|------|-------------|--------------|--------------|---------|
| 1        | 15.424        | MF   | 0.5402      | 3.42056e4    | 1055.24438   | 84.5111 |
| 2        | 16.266        | FM   | 0.4613      | 1559.04700   | 56.33274     | 3.8519  |
| 3        | 17.645        | MM   | 0.5954      | 3832.75146   | 107.29118    | 9.4695  |
| 4        | 21.655        | MM   | 0.6000      | 877.29645    | 24.37019     | 2.1675  |
| Totals : |               |      |             | 4.04747e4    | 1243.23850   |         |

HPLC, Lux cellulose-4 column, hexanes: isopropanol = 8:2, 1.0 mL/min,  $\lambda$  = 254 nm.

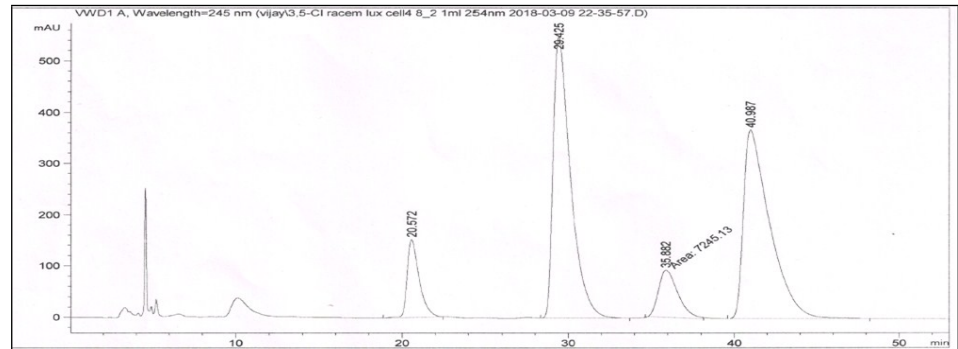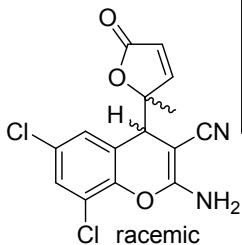



Signal 1: VWD1 A, Wavelength=245 nm

| Peak # | RetTime [min] | Type | Width [min] | Area [mAU*s] | Height [mAU] | Area %  |
|--------|---------------|------|-------------|--------------|--------------|---------|
| 1      | 20.572        | BB   | 0.7485      | 7548.50537   | 151.18475    | 7.9170  |
| 2      | 29.425        | BB   | 1.0716      | 4.01268e4    | 547.80701    | 42.0857 |
| 3      | 35.882        | MM   | 1.3326      | 7245.13281   | 90.61201     | 7.5988  |
| 4      | 40.987        | BB   | 1.5464      | 4.04251e4    | 368.06082    | 42.3985 |

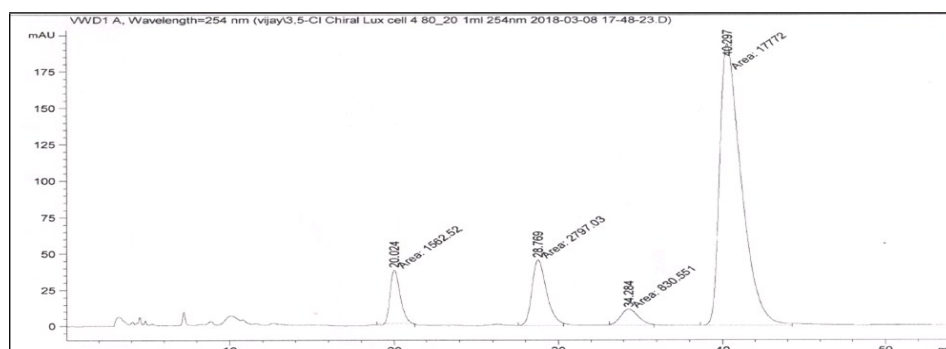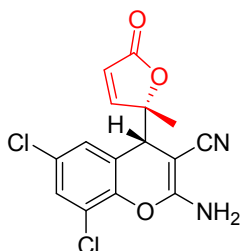

3d, 87:13 er (syn)

Signal 1: VWD1 A, Wavelength=254 nm

| Peak # | RetTime [min] | Type | Width [min] | Area [mAU*s] | Height [mAU] | Area %  |
|--------|---------------|------|-------------|--------------|--------------|---------|
| 1      | 20.024        | MM   | 0.7039      | 1562.51636   | 36.99631     | 6.8048  |
| 2      | 28.769        | MM   | 1.0276      | 2797.03027   | 45.36296     | 12.1811 |
| 3      | 34.284        | MM   | 1.2522      | 830.55060    | 11.05422     | 3.6170  |
| 4      | 40.297        | MM   | 1.5283      | 1.77720e4    | 193.81644    | 77.3972 |

HPLC, Lux cellulose-4 column, hexanes: isopropanol = 8:2, 1.0 mL/min,  $\lambda = 254$  nm.

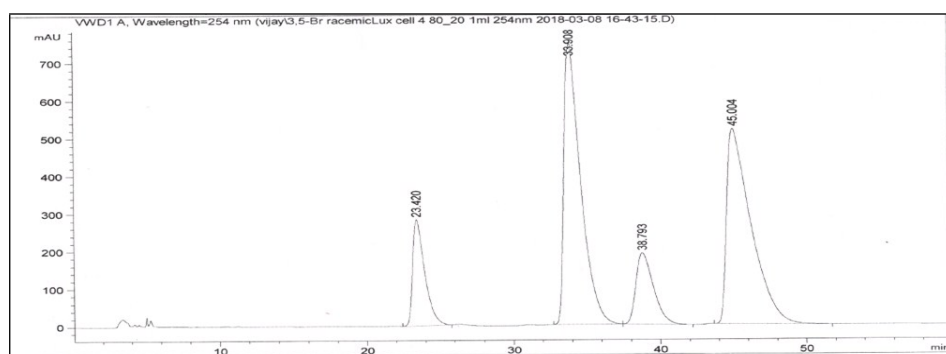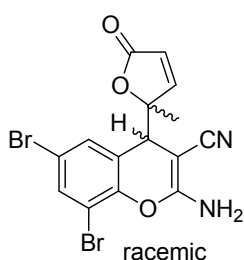

Signal 1: VWD1 A, Wavelength=254 nm

| Peak # | RetTime [min] | Type | Width [min] | Area [mAU*s] | Height [mAU] | Area %  |
|--------|---------------|------|-------------|--------------|--------------|---------|
| 1      | 23.420        | BB   | 0.8644      | 1.61819e4    | 282.03174    | 10.7160 |
| 2      | 33.908        | BB   | 1.0983      | 5.94764e4    | 745.05573    | 39.3866 |
| 3      | 38.793        | BB   | 1.2726      | 1.56680e4    | 189.50336    | 10.3757 |
| 4      | 45.004        | BB   | 1.5716      | 5.96802e4    | 519.00012    | 39.5216 |

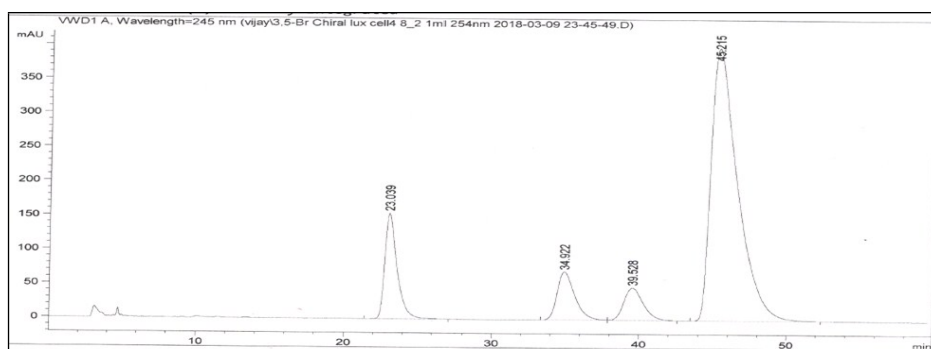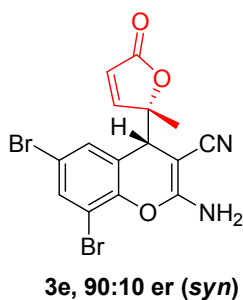

Signal 1: VWD1 A, Wavelength=245 nm

| Peak # | RetTime [min] | Type | Width [min] | Area [mAU*s] | Height [mAU] | Area %  |
|--------|---------------|------|-------------|--------------|--------------|---------|
| 1      | 23.039        | BB   | 0.8607      | 8905.87207   | 154.67427    | 12.9641 |
| 2      | 34.922        | BB   | 1.2409      | 5739.71777   | 69.90378     | 8.3552  |
| 3      | 39.528        | BB   | 1.3399      | 4224.68408   | 47.12553     | 6.1498  |
| 4      | 45.215        | BB   | 1.7173      | 4.98260e4    | 398.89474    | 72.5308 |

HPLC, Lux cellulose-4 column, hexanes: isopropanol = 8:2, 1.0 mL/min,  $\lambda = 254$  nm.

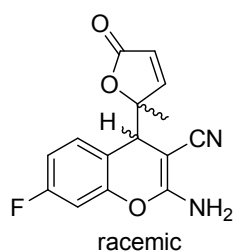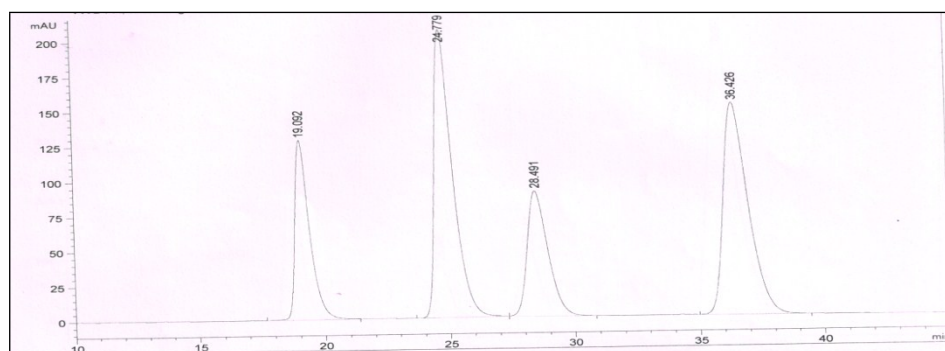

Signal 1: VWD1 A, Wavelength=254 nm

| Peak # | RetTime [min] | Type | Width [min] | Area [mAU*s] | Height [mAU] | Area %  |
|--------|---------------|------|-------------|--------------|--------------|---------|
| 1      | 19.092        | BB   | 0.6046      | 5154.63721   | 128.32356    | 16.5378 |
| 2      | 24.779        | BB   | 0.7684      | 1.04534e4    | 206.20622    | 33.5380 |
| 3      | 28.491        | BB   | 0.8704      | 5105.89111   | 89.65244     | 16.3814 |
| 4      | 36.426        | BB   | 1.0576      | 1.04549e4    | 151.98244    | 33.5429 |

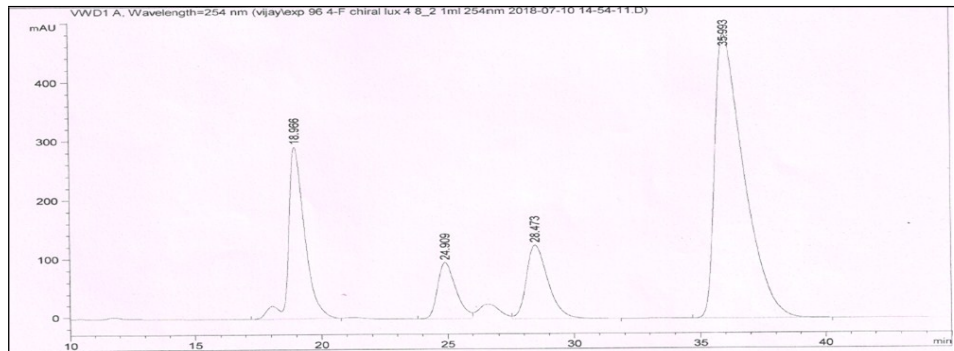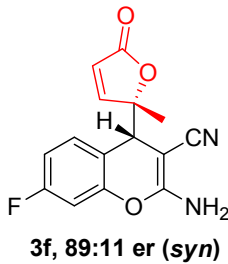

Signal 1: VWD1 A, Wavelength=254 nm

| Peak # | RetTime [min] | Type | Width [min] | Area [mAU*s] | Height [mAU] | Area %  |
|--------|---------------|------|-------------|--------------|--------------|---------|
| 1      | 18.966        | VB R | 0.6367      | 1.30661e4    | 292.07690    | 20.2790 |
| 2      | 24.909        | BV   | 0.7872      | 4961.70068   | 96.44021     | 7.7007  |
| 3      | 28.473        | VB   | 0.9139      | 7499.20459   | 125.71819    | 11.6390 |
| 4      | 35.993        | BB   | 1.1984      | 3.89046e4    | 483.15979    | 60.3813 |

HPLC, Chiralpak ID, hexanes: isopropanol = 8:2, 1.0 mL/min,  $\lambda = 254$  nm.

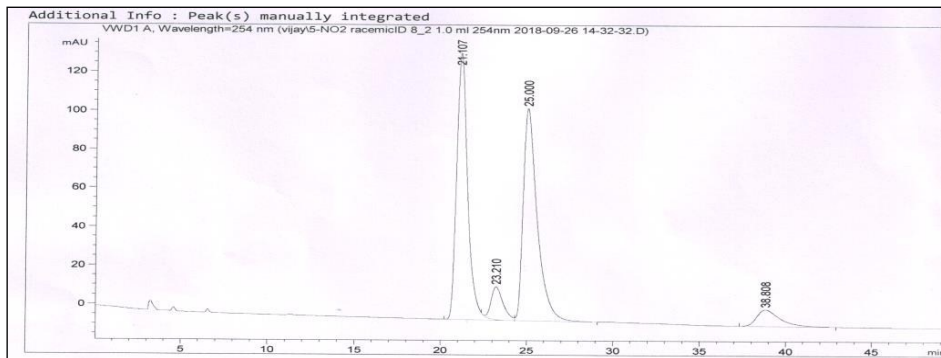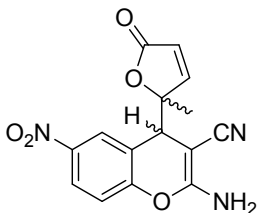

Signal 1: VWD1 A, Wavelength=254 nm

| Peak #   | RetTime [min] | Type | Width [min] | Area [mAU*s] | Height [mAU] | Area %  |
|----------|---------------|------|-------------|--------------|--------------|---------|
| 1        | 21.107        | BV R | 0.6728      | 6118.74072   | 137.33020    | 44.0105 |
| 2        | 23.210        | VV E | 0.7322      | 814.91644    | 16.91070     | 5.8615  |
| 3        | 25.000        | VB   | 0.8356      | 6159.41650   | 109.44867    | 44.3031 |
| 4        | 38.808        | BB   | 1.2101      | 809.83032    | 8.54940      | 5.8249  |
| Totals : |               |      |             | 1.39029e4    | 272.23897    |         |

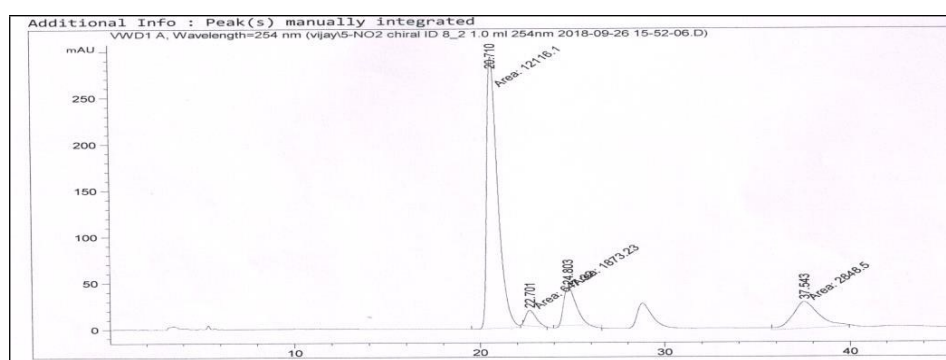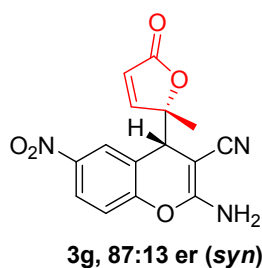

Signal 1: VWD1 A, Wavelength=254 nm

| Peak #   | RetTime [min] | Type | Width [min] | Area [mAU*s] | Height [mAU] | Area %  |
|----------|---------------|------|-------------|--------------|--------------|---------|
| 1        | 20.710        | MM   | 0.6890      | 1.21161e4    | 293.07172    | 69.2937 |
| 2        | 22.701        | MM   | 0.6482      | 647.32019    | 16.64503     | 3.7021  |
| 3        | 24.803        | MM   | 0.7662      | 1873.23022   | 40.74587     | 10.7132 |
| 4        | 37.543        | MM   | 1.6579      | 2848.49756   | 28.63550     | 16.2909 |
| Totals : |               |      |             | 1.74852e4    | 379.09811    |         |

HPLC, Chiralpak IE column, hexanes: isopropanol = 8:2, 1.0 mL/min,  $\lambda$  = 254 nm.

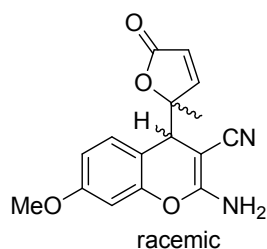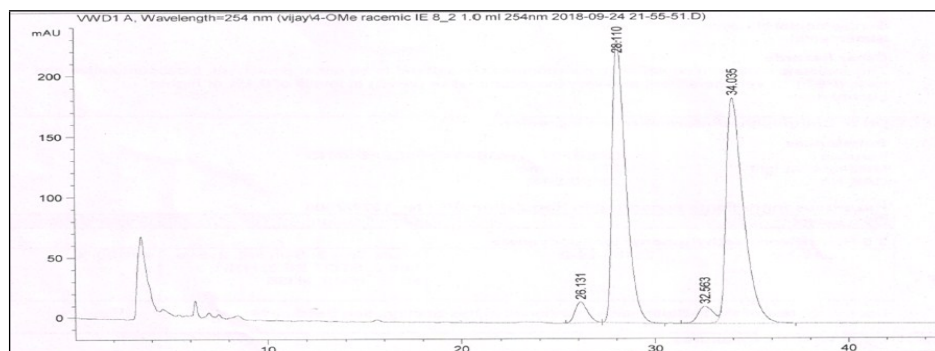

Signal 1: VWD1 A, Wavelength=254 nm

| Peak # | RetTime [min] | Type | Width [min] | Area [mAU*s] | Height [mAU] | Area %  |
|--------|---------------|------|-------------|--------------|--------------|---------|
| 1      | 26.131        | BB   | 0.6917      | 788.41724    | 17.80034     | 3.1772  |
| 2      | 28.110        | BB   | 0.7549      | 1.15592e4    | 233.75085    | 46.5816 |
| 3      | 32.563        | BV E | 0.7589      | 750.13708    | 14.53911     | 3.0229  |
| 4      | 34.035        | VB R | 0.9480      | 1.17172e4    | 187.00363    | 47.2183 |

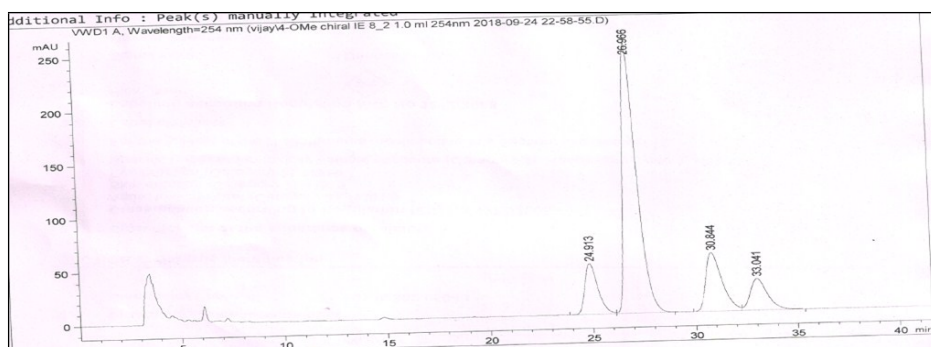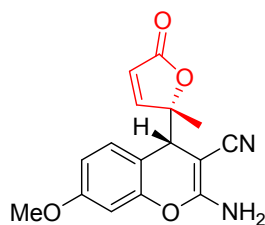

3h, 87:13 er (syn)

Signal 1: VWD1 A, Wavelength=254 nm

| Peak # | RetTime [min] | Type | Width [min] | Area [mAU*s] | Height [mAU] | Area %  |
|--------|---------------|------|-------------|--------------|--------------|---------|
| 1      | 24.913        | BV   | 0.6798      | 2100.95581   | 47.89386     | 11.1362 |
| 2      | 26.966        | VB   | 0.7227      | 1.19733e4    | 254.09586    | 63.4645 |
| 3      | 30.844        | BV   | 0.8286      | 3037.93750   | 55.32360     | 16.1027 |
| 4      | 33.041        | VB   | 0.8820      | 1753.90503   | 29.82700     | 9.2966  |

HPLC, Chiralpak IC column, hexanes: isopropanol = 8:2, 1.0 mL/min,  $\lambda = 254$  nm.

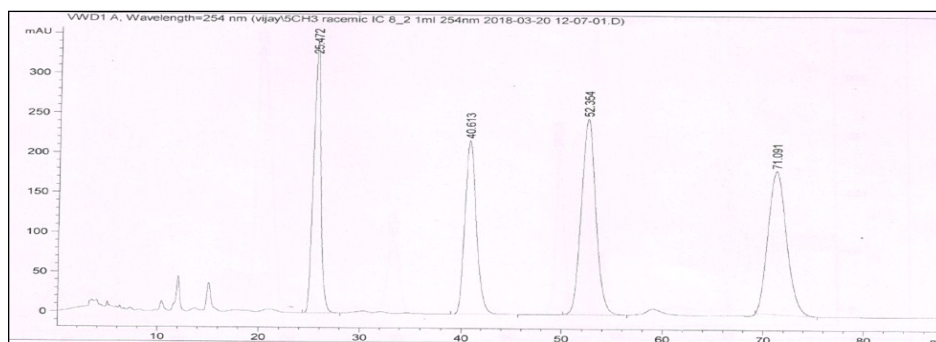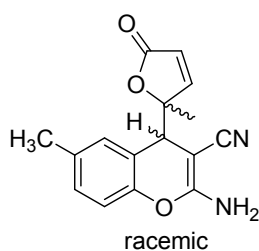

racemic

Signal 1: VWD1 A, Wavelength=254 nm

| Peak # | RetTime [min] | Type | Width [min] | Area [mAU*s] | Height [mAU] | Area %  |
|--------|---------------|------|-------------|--------------|--------------|---------|
| 1      | 25.472        | BB   | 0.7770      | 1.72534e4    | 340.61041    | 20.9633 |
| 2      | 40.613        | BB   | 1.2291      | 1.74665e4    | 218.39073    | 21.2223 |
| 3      | 52.354        | BB   | 1.4043      | 2.45017e4    | 246.13969    | 29.7703 |
| 4      | 71.091        | BB   | 1.7584      | 2.30810e4    | 179.71390    | 28.0441 |

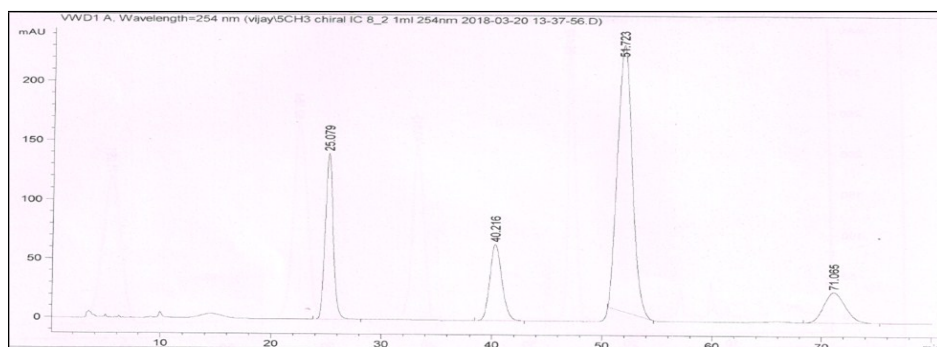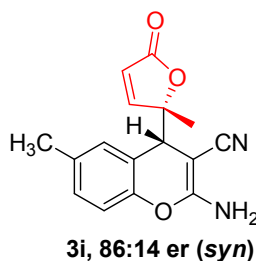

Signal 1: VWD1 A, Wavelength=254 nm

| Peak # | RetTime [min] | Type | Width [min] | Area [mAU*s] | Height [mAU] | Area %  |
|--------|---------------|------|-------------|--------------|--------------|---------|
| 1      | 25.079        | BB   | 0.7593      | 6981.23828   | 140.34831    | 19.0595 |
| 2      | 40.216        | BB   | 1.1817      | 4959.40771   | 64.96187     | 13.5397 |
| 3      | 51.723        | BB   | 1.3767      | 2.11328e4    | 225.01875    | 57.6948 |
| 4      | 71.065        | BB   | 1.8485      | 3555.17993   | 26.17641     | 9.7060  |

HPLC, Chiralpak ID column, hexanes: isopropanol = 8:2, 1.0 mL/min,  $\lambda = 254$  nm.

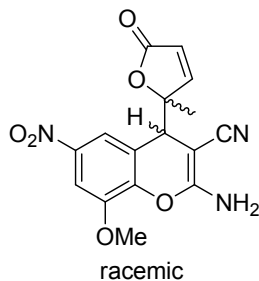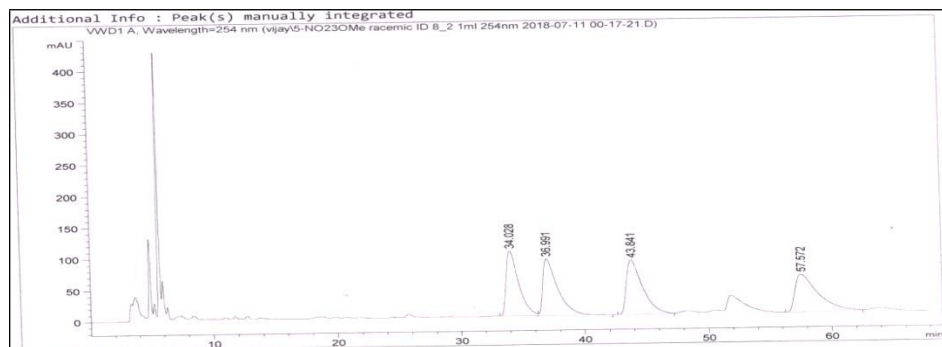

Signal 1: VWD1 A, Wavelength=254 nm

| Peak # | RetTime [min] | Type | Width [min] | Area [mAU*s] | Height [mAU] | Area %  |
|--------|---------------|------|-------------|--------------|--------------|---------|
| 1      | 34.028        | BV   | 1.0388      | 7297.29590   | 103.09281    | 24.1431 |
| 2      | 36.991        | VB   | 1.1978      | 7470.90576   | 89.87405     | 24.7175 |
| 3      | 43.841        | BB   | 1.2966      | 7781.48633   | 86.65832     | 25.7450 |
| 4      | 57.572        | BB   | 1.7323      | 7675.52881   | 60.00613     | 25.3945 |

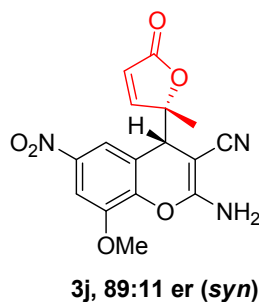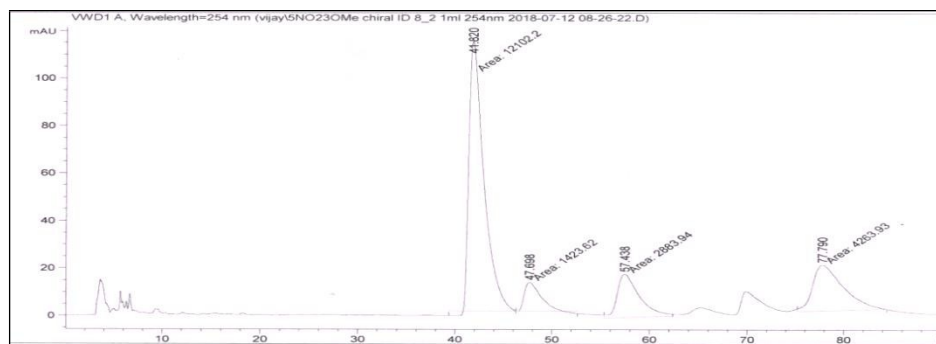

Signal 1: VWD1 A, Wavelength=254 nm

| Peak # | RetTime [min] | Type | Width [min] | Area [mAU*s] | Height [mAU] | Area %  |
|--------|---------------|------|-------------|--------------|--------------|---------|
| 1      | 41.820        | MF   | 1.7724      | 1.21022e4    | 113.80166    | 58.5392 |
| 2      | 47.698        | FM   | 1.9502      | 1423.62219   | 12.16616     | 6.8861  |
| 3      | 57.438        | MM   | 2.6360      | 2883.94189   | 18.23438     | 13.9498 |
| 4      | 77.790        | MM   | 3.7035      | 4263.92676   | 19.18888     | 20.6249 |

HPLC, Chiralpak ID column, hexanes: isopropanol = 8:2, 1.0 mL/min,  $\lambda = 254$  nm.

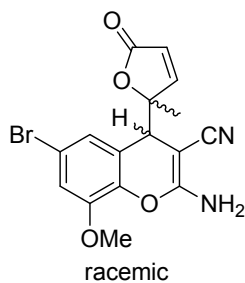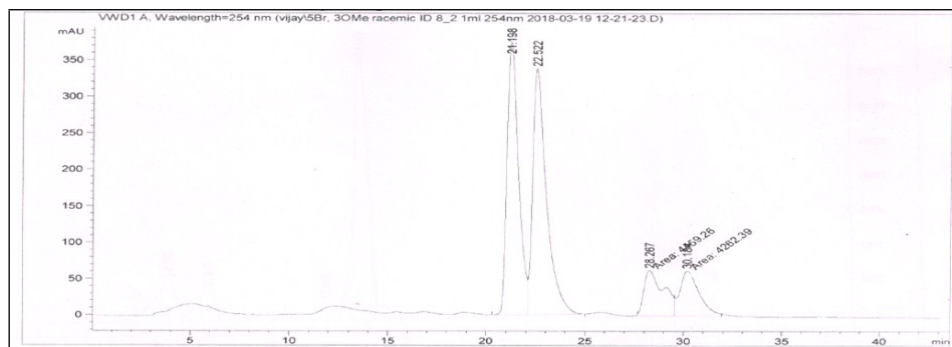

Signal 1: VWD1 A, Wavelength=254 nm

| Peak # | RetTime [min] | Type | Width [min] | Area [mAU*s] | Height [mAU] | Area %  |
|--------|---------------|------|-------------|--------------|--------------|---------|
| 1      | 21.198        | BV   | 0.6173      | 1.52857e4    | 375.16977    | 37.7451 |
| 2      | 22.522        | VB   | 0.7118      | 1.64898e4    | 337.63852    | 40.7184 |
| 3      | 28.267        | MF   | 1.1716      | 4459.26172   | 63.43809     | 11.0113 |
| 4      | 30.184        | FM   | 1.1359      | 4262.38525   | 62.54182     | 10.5252 |

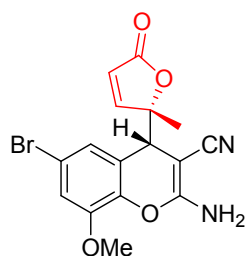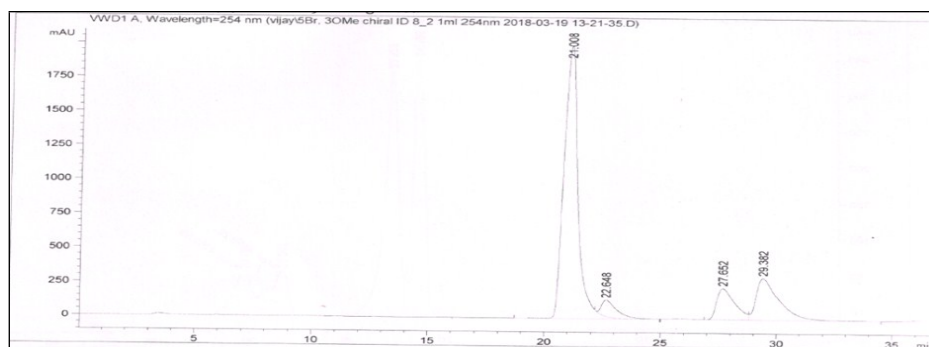

Signal 1: VWD1 A, Wavelength=254 nm

| Peak # | RetTime [min] | Type | Width [min] | Area [mAU*s] | Height [mAU] | Area %  |
|--------|---------------|------|-------------|--------------|--------------|---------|
| 1      | 21.008        | BV R | 0.6649      | 8.43477e4    | 1996.36902   | 68.2538 |
| 2      | 22.648        | VB E | 0.6826      | 5590.73486   | 119.32601    | 4.5240  |
| 3      | 27.652        | BV   | 0.8007      | 1.24662e4    | 230.97147    | 10.0876 |
| 4      | 29.382        | VB   | 0.9868      | 2.11748e4    | 307.32919    | 17.1346 |

HPLC, Chiralpak ID column, hexanes: isopropanol = 8:2, 1.0 mL/min,  $\lambda$  = 254 nm.



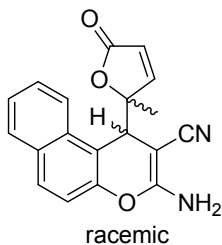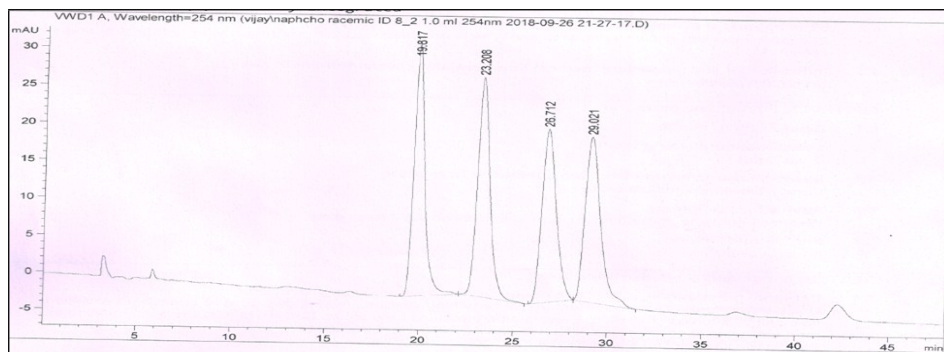

Signal 1: VWD1 A, Wavelength=254 nm

| Peak # | RetTime [min] | Type | Width [min] | Area [mAU*s] | Height [mAU] | Area %  |
|--------|---------------|------|-------------|--------------|--------------|---------|
| 1      | 19.817        | BB   | 0.6204      | 1358.59607   | 33.47892     | 26.1042 |
| 2      | 23.208        | BB   | 0.7069      | 1352.45410   | 29.16927     | 25.9862 |
| 3      | 26.712        | BB   | 0.8204      | 1224.39270   | 23.06222     | 23.5256 |
| 4      | 29.021        | BB   | 0.8686      | 1269.06860   | 21.98074     | 24.3840 |

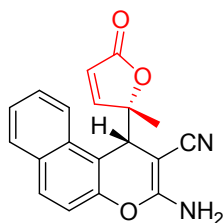

3l, 83:17 er (syn)

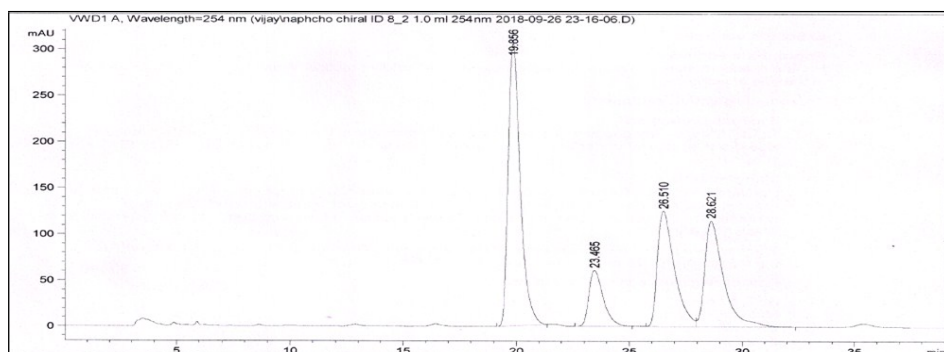

Signal 1: VWD1 A, Wavelength=254 nm

| Peak # | RetTime [min] | Type | Width [min] | Area [mAU*s] | Height [mAU] | Area %  |
|--------|---------------|------|-------------|--------------|--------------|---------|
| 1      | 19.856        | BB   | 0.5784      | 1.14950e4    | 305.87585    | 42.0872 |
| 2      | 23.465        | BB   | 0.6715      | 2652.16602   | 60.85109     | 9.7105  |
| 3      | 26.510        | BV   | 0.7774      | 6531.15332   | 125.23237    | 23.9127 |
| 4      | 28.621        | VB   | 0.8512      | 6634.08594   | 114.97156    | 24.2896 |

HPLC, Lux cellulose-4 column, hexanes: isopropanol = 8:2, 1.0 mL/min,  $\lambda = 254$  nm.

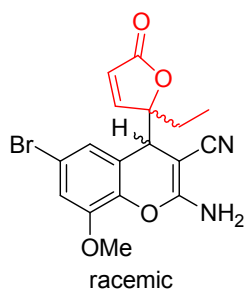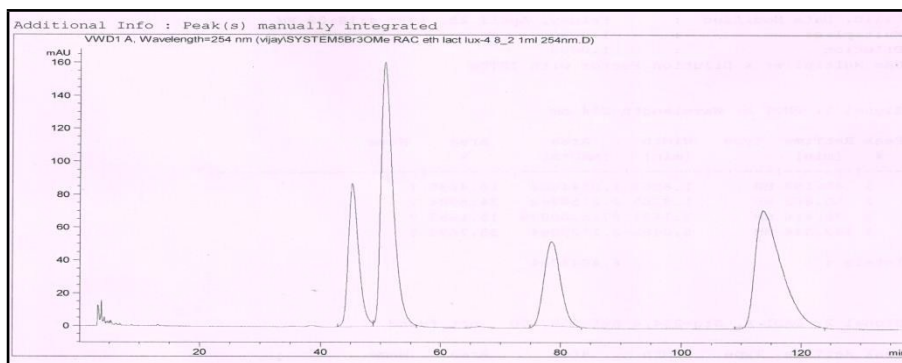

Signal 1: VWD1 A, Wavelength=254 nm

| Peak # | RetTime [min] | Type | Width [min] | Area [mAU*s] | Area %  |
|--------|---------------|------|-------------|--------------|---------|
| 1      | 45.193        | BB   | 1.8063      | 1.05446e4    | 16.4635 |
| 2      | 50.662        | BB   | 1.9365      | 2.21597e4    | 34.5984 |
| 3      | 78.416        | MM   | 3.1691      | 9715.00879   | 15.1683 |
| 4      | 113.544       | MM   | 5.0482      | 2.16290e4    | 33.7698 |

Totals : 6.40483e4

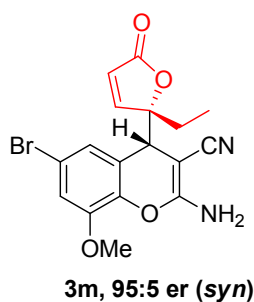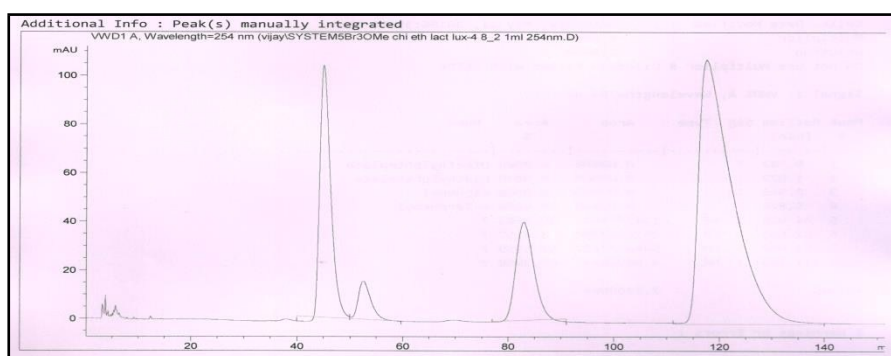

| Peak # | RetTime [min] | Sig | Type | Area       | Area %  |
|--------|---------------|-----|------|------------|---------|
| 5      | 44.926        | 1   | MF   | 1.47454e4  | 19.5903 |
| 6      | 52.566        | 1   | FM   | 2570.97290 | 3.4157  |
| 7      | 83.000        | 1   | MM   | 9480.77637 | 12.5959 |
| 8      | 117.409       | 1   | MM   | 4.84716e4  | 64.3980 |

Totals : 7.52688e4

HPLC, Lux cellulose-4 column, hexanes: isopropanol = 8:2, 1.0 mL/min,  $\lambda = 254$  nm.

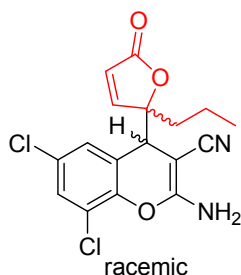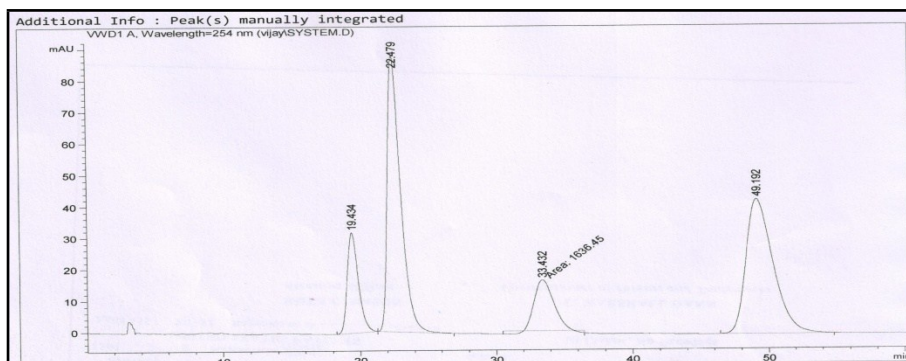

Signal 1: VWD1 A, Wavelength=254 nm

| Peak #   | RetTime [min] | Type | Width [min] | Area [mAU*s] | Height [mAU] | Area %  |
|----------|---------------|------|-------------|--------------|--------------|---------|
| 1        | 19.434        | BB   | 0.8656      | 1817.30139   | 32.00016     | 11.8023 |
| 2        | 22.479        | BB   | 1.0292      | 5954.14648   | 87.79508     | 38.6687 |
| 3        | 33.432        | MM   | 1.6832      | 1636.44971   | 16.20422     | 10.6278 |
| 4        | 49.192        | BB   | 1.9764      | 5989.93701   | 42.96889     | 38.9012 |
| Totals : |               |      |             | 1.53978e4    | 178.96835    |         |

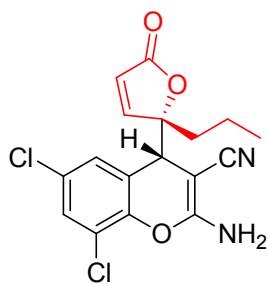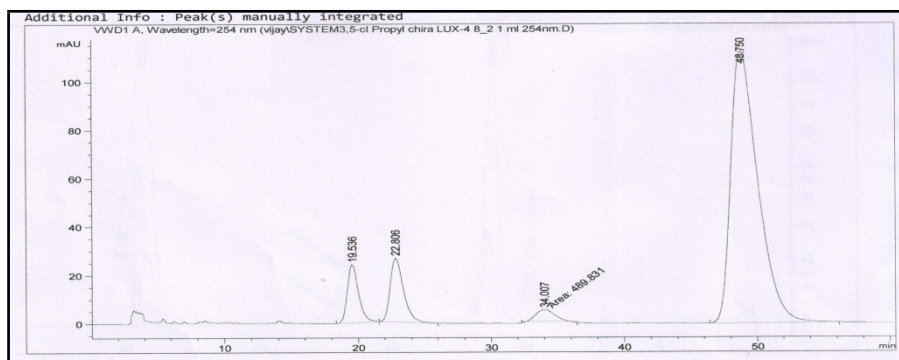

Signal 1: VWD1 A, Wavelength=254 nm

| Peak # | RetTime [min] | Type | Width [min] | Area [mAU*s] | Height [mAU] | Area %  |
|--------|---------------|------|-------------|--------------|--------------|---------|
| 1      | 19.536        | BB   | 0.8879      | 1415.04419   | 24.10355     | 7.1609  |
| 2      | 22.806        | BB   | 1.0329      | 1833.51721   | 26.44561     | 9.2786  |
| 3      | 34.007        | MM   | 1.6454      | 489.83096    | 4.96157      | 2.4788  |
| 4      | 48.750        | BB   | 1.9960      | 1.60223e4    | 112.33318    | 81.0816 |

### HPLC data for Reaction performed at 5 mmol scale:

HPLC, Chiralpak ID, hexanes: isopropanol = 8:2, 1.0 mL/min,  $\lambda = 254$  nm.

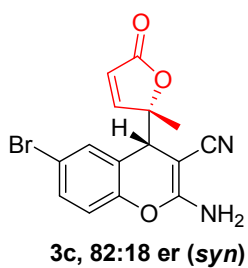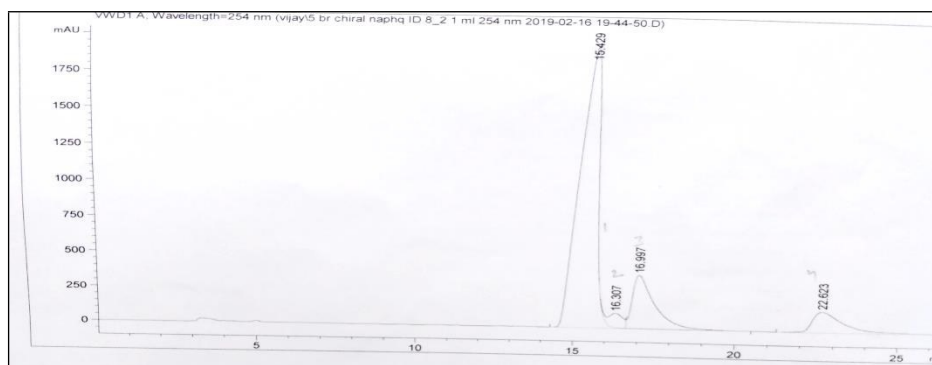

Signal 1: VWD1 A, Wavelength=254 nm

| Peak #   | RetTime [min] | Type | Width [min] | Area [mAU*s] | Height [mAU] | Area %  |
|----------|---------------|------|-------------|--------------|--------------|---------|
| 1        | 15.429        | BV R | 0.7157      | 8.03014e4    | 1948.75574   | 71.7581 |
| 2        | 16.307        | VV E | 0.4856      | 3401.24023   | 103.97865    | 3.0394  |
| 3        | 16.997        | VB E | 0.6783      | 1.83462e4    | 382.70660    | 16.3943 |
| 4        | 22.623        | BBA  | 0.9797      | 9856.80566   | 146.53960    | 8.8081  |
| Totals : |               |      |             | 1.11906e5    | 2581.98059   |         |
